# Supplementary material for: Palaeohydrological changes over the last 50 ky in the central Gulf of Cadiz:complex forcing mechanisms mixing multi-scale processes
Source: Copernicus journal article supplement (doi:10.5194/bg-13-5357-2016), 2016-09-27
Supplement: Supplementary file 1 [file MD99-2339-SUPPLEMENT.xls]

## Sheet: MD99-2339 dinocyst data
obsname	age	ALEX	ATAX	BTEP	BSPO	IACU	IPAL	IPAR	IPAT	ISPH	ISTR	IPLI	IVEL	IJAP	LMAC	NLAB	NRIG	OCEN	OISR	OJAN	OLON	PZOH	PRET	SMEM	SDEL	SELO	SRAM	SBEN	SLAZ	SMIR	SGRA	SPAC	SSEP	TPEL	PDAL	IMIN	IMIC	IBRE	EKAR	BSPP	PERI	SNEP	XXAN	SQUA	STEL	TAPP	TVAR	VCAL	VSPI
6	0.167509	0	0	2.29885	0	4.5977	0	0	6.89655	0	2.29885	0	0	0	747.126	2.29885	0	45.977	2.29885	2.29885	0	0	0	55.1724	11.4943	0	9.1954	11.4943	9.1954	55.1724	0	0	0	0	0	0	0	0	2.29885	4.5977	2.29885	0	0	0	0	0	0	0	2.29885
10	0.289333	0	0	2.24215	0	8.96861	0	2.24215	11.2108	0	0	0	0	0	744.395	4.4843	0	29.148	0	2.24215	0	0	0	26.9058	8.96861	0	2.24215	17.9372	2.24215	67.2646	0	2.24215	0	0	0	0	0	0	6.72646	8.96861	0	2.24215	0	8.96861	0	2.24215	0	0	0
20	0.593895	0	0	0	0	11.6959	0	0	5.84795	0	0	0	0	0	704.678	0	0	32.1637	2.92398	2.92398	0	0	8.77193	58.4795	8.77193	0	5.84795	8.77193	2.92398	49.7076	0	0	2.92398	0	0	0	0	0	5.84795	43.8596	2.92398	8.77193	2.92398	8.77193	0	0	0	0	0
30	0.898456	0	2.6738	2.6738	0	8.02139	0	2.6738	5.34759	0	0	0	0	0	711.23	8.02139	0	45.4545	2.6738	0	0	0	0	48.1283	10.6952	0	0	21.3904	2.6738	50.8021	0	0	0	0	0	0	0	0	2.6738	26.738	2.6738	2.6738	0	8.02139	0	0	0	0	2.6738
40	1.20302	0	0	3.25733	0	13.0293	0	6.51466	16.2866	0	0	0	0	0	667.752	0	0	32.5733	0	0	0	0	3.25733	45.6026	13.0293	0	0	19.544	0	58.6319	0	0	0	0	0	0	0	0	3.25733	61.8893	6.51466	6.51466	0	9.77199	0	0	0	0	6.51466
50	1.50758	0	0	0	0	7.8534	0	2.6178	5.2356	2.6178	0	0	0	0	649.215	10.4712	0	20.9424	2.6178	0	0	0	0	65.445	23.5602	0	5.2356	34.0314	0	39.267	0	0	0	0	0	0	0	0	7.8534	44.5026	2.6178	5.2356	0	18.3246	0	0	0	0	13.089
60	1.84491	0	0	0	0	15.5844	0	0	2.5974	5.19481	2.5974	0	0	0	737.662	2.5974	0	31.1688	0	0	0	0	5.19481	38.961	23.3766	0	10.3896	18.1818	2.5974	49.3506	0	0	0	0	0	0	0	0	0	18.1818	2.5974	2.5974	0	0	0	2.5974	0	0	2.5974
70	2.28056	0	0	0	0	5.05051	0	0	2.52525	0	0	0	0	0	739.899	10.101	0	40.404	2.52525	0	0	0	2.52525	45.4545	15.1515	0	7.57576	20.202	2.52525	53.0303	0	0	0	0	0	0	0	0	5.05051	7.57576	2.52525	0	0	12.6263	0	0	0	0	7.57576
80	2.71621	0	0	0	0	10.8992	0	0	2.7248	0	2.7248	0	0	0	713.896	5.44959	0	24.5232	8.17439	0	0	2.7248	2.7248	38.1471	8.17439	0	0	16.3488	2.7248	46.3215	0	0	0	0	0	0	0	0	8.17439	68.1199	5.44959	2.7248	0	2.7248	0	0	0	0	0
90	3.15186	0	0	0	0	42.4242	0	6.06061	0	0	0	0	0	0	681.818	3.0303	0	60.6061	3.0303	0	0	0	0	81.8182	21.2121	0	12.1212	3.0303	3.0303	36.3636	0	0	0	0	0	0	0	0	3.0303	21.2121	3.0303	3.0303	0	3.0303	0	0	0	0	0
100	3.58751	0	0	0	0	26.1438	0	6.53595	3.26797	0	9.80392	0	0	0	663.399	3.26797	0	39.2157	3.26797	0	0	0	13.0719	75.1634	29.4118	0	6.53595	3.26797	0	55.5556	0	0	0	0	0	0	0	0	0	22.8758	3.26797	9.80392	0	3.26797	0	0	0	0	6.53595
110	4.02316	0	0	3.03951	0	18.2371	0	6.07903	9.11854	0	6.07903	0	0	0	683.891	3.03951	0	39.5137	3.03951	0	0	0	3.03951	60.7903	15.1976	0	9.11854	12.1581	0	51.6717	0	0	0	0	0	0	0	0	9.11854	30.3951	0	6.07903	0	6.07903	0	0	0	0	3.03951
120	4.45881	0	0	0	0	22.6537	0	0	19.4175	0	0	0	0	0	618.123	3.23625	0	51.7799	3.23625	0	0	0	3.23625	106.796	6.47249	0	6.47249	12.945	3.23625	48.5437	0	0	0	0	0	0	0	0	0	32.3625	0	12.945	0	12.945	0	0	0	0	0
130	4.89446	0	0	0	0	16.129	0	6.45161	9.67742	6.45161	12.9032	0	0	0	577.419	6.45161	0	87.0968	6.45161	0	0	0	6.45161	83.871	9.67742	0	3.22581	6.45161	0	87.0968	0	0	0	0	0	0	0	0	0	32.2581	0	3.22581	0	0	0	0	0	0	6.45161
140	5.33011	0	0	0	0	31.348	3.1348	9.40439	9.40439	0	6.26959	0	0	0	551.724	6.26959	0	65.8307	0	0	0	0	12.5392	100.313	15.674	0	6.26959	9.40439	12.5392	90.9091	0	0	3.1348	0	0	0	0	0	0	31.348	0	3.1348	0	0	0	3.1348	0	0	0
150	5.76576	0	0	0	0	33.557	0	6.71141	3.3557	0	3.3557	0	0	0	637.584	6.71141	0	50.3356	3.3557	0	0	0	6.71141	60.4027	16.7785	0	0	16.7785	3.3557	53.6913	0	0	0	0	0	0	0	0	0	33.557	3.3557	6.71141	0	23.4899	0	0	0	0	3.3557
160	6.3625	0	0	0	0	72.6073	0	9.90099	19.802	0	3.30033	0	0	0	528.053	3.30033	0	56.1056	3.30033	0	0	0	13.2013	105.611	13.2013	0	13.2013	9.90099	6.60066	46.2046	0	0	0	0	0	0	0	0	3.30033	23.1023	6.60066	9.90099	0	0	0	3.30033	0	0	9.90099
170	7.4425	0	3.26797	3.26797	0	65.3595	0	0	26.1438	0	16.3399	0	0	0	454.248	3.26797	0	65.3595	0	0	0	0	9.80392	78.4314	6.53595	0	13.0719	16.3399	0	88.2353	0	3.26797	0	0	0	0	0	0	6.53595	65.3595	3.26797	6.53595	0	13.0719	0	0	0	0	22.8758
180	8.5225	0	0	0	0	82.5397	0	12.6984	9.52381	6.34921	15.873	0	0	0	460.317	19.0476	0	53.9683	3.1746	3.1746	0	0	9.52381	104.762	15.873	0	19.0476	6.34921	6.34921	79.3651	0	0	6.34921	0	0	0	0	0	6.34921	31.746	3.1746	6.34921	0	3.1746	0	0	0	0	3.1746
190	9.5009	0	0	0	0	30.2013	0	10.0671	3.3557	3.3557	10.0671	0	0	0	644.295	16.7785	0	33.557	3.3557	0	0	0	3.3557	87.2483	13.4228	3.3557	6.71141	13.4228	10.0671	36.9128	0	0	0	0	0	0	0	0	0	26.8456	0	0	0	3.3557	0	0	0	0	0
200	10.4793	0	0	3.125	0	15.625	0	0	3.125	0	0	0	0	0	640.625	31.25	0	40.625	0	0	0	0	3.125	62.5	12.5	0	9.375	6.25	3.125	18.75	0	0	0	0	0	0	0	0	0	90.625	15.625	3.125	0	6.25	0	0	0	0	0
210	11.4577	0	0	2.96736	0	5.93472	0	0	0	0	0	0	0	0	617.211	71.2166	0	38.5757	2.96736	0	0	0	0	80.1187	23.7389	2.96736	29.6736	8.90208	17.8042	8.90208	0	0	0	0	0	0	0	0	2.96736	38.5757	8.90208	0	0	5.93472	0	0	0	0	0
220	12.2758	0	0	0	0	3.20513	0	0	3.20513	0	0	0	0	0	615.385	83.3333	0	38.4615	0	0	0	0	0	112.179	9.61538	0	38.4615	16.0256	6.41026	22.4359	0	0	0	0	0	0	0	0	0	22.4359	0	0	0	0	0	0	0	0	6.41026
230	12.613	0	2.04499	8.17996	0	6.13497	0	0	2.04499	0	0	0	0	0	783.231	8.17996	0	24.5399	4.08998	0	0	0	0	65.4397	12.2699	0	4.08998	8.17996	4.08998	18.4049	0	2.04499	0	0	0	0	0	0	2.04499	22.4949	2.04499	2.04499	0	6.13497	0	0	0	0	0
240	12.9501	0	0	0	0	1.70358	0	3.40716	5.11073	1.70358	0	0	0	0	834.753	5.11073	0	30.6644	5.11073	0	0	0	0	34.0716	3.40716	0	1.70358	8.51789	1.70358	17.0358	0	0	0	0	0	0	0	0	1.70358	11.925	3.40716	3.40716	1.70358	3.40716	0	0	0	0	0
250	13.2873	0	0	0	0	1.67224	0	3.34448	1.67224	0	1.67224	0	0	0	836.12	3.34448	0	30.1003	1.67224	0	0	0	0	56.8562	10.0334	0	0	6.68896	0	11.7057	0	0	1.67224	0	0	0	0	0	0	15.0502	3.34448	1.67224	0	1.67224	0	0	0	0	0
260	13.6245	0	0	1.97628	0	5.92885	0	3.95257	3.95257	3.95257	1.97628	0	0	0	792.49	7.90514	0	19.7628	1.97628	0	0	0	0	63.2411	5.92885	0	0	11.8577	0	15.8103	0	0	0	0	0	0	0	0	0	27.668	1.97628	5.92885	0	3.95257	0	0	0	0	0
270	13.9616	0	2.39234	0	0	4.78469	0	2.39234	2.39234	0	0	0	0	0	755.981	7.17703	0	33.4928	9.56938	0	0	0	0	66.9856	4.78469	2.39234	0	2.39234	2.39234	16.7464	0	0	0	0	0	0	0	0	0	43.0622	4.78469	0	2.39234	21.5311	0	0	0	0	0
280	14.2951	0	0	3.33333	0	16.6667	0	6.66667	10	0	6.66667	0	0	0	630	10	0	46.6667	6.66667	0	0	0	0	83.3333	36.6667	0	0	3.33333	0	16.6667	0	0	0	0	3.33333	0	0	0	10	46.6667	3.33333	10	0	6.66667	0	0	0	0	0
290	14.6177	6.43087	0	3.21543	0	51.4469	0	3.21543	32.1543	0	9.6463	0	0	0	536.977	6.43087	0	41.8006	6.43087	0	0	0	3.21543	99.6785	25.7235	0	9.6463	16.0772	3.21543	12.8617	0	3.21543	0	0	0	0	0	0	3.21543	51.4469	6.43087	16.0772	0	0	0	3.21543	0	0	0
300	14.9403	0	0	6.25	0	43.75	0	6.25	53.125	0	0	0	0	0	500	3.125	0	15.625	3.125	0	0	0	0	84.375	25	6.25	9.375	12.5	9.375	18.75	0	0	9.375	0	0	0	0	0	3.125	106.25	12.5	21.875	0	6.25	0	0	0	0	0
310	15.2629	3.3557	0	3.3557	0	10.0671	0	0	0	3.3557	0	0	0	0	597.315	10.0671	0	30.2013	10.0671	0	0	0	0	120.805	6.71141	13.4228	3.3557	3.3557	36.9128	16.7785	0	0	0	0	0	0	0	0	6.71141	80.5369	0	0	3.3557	20.1342	0	0	0	0	6.71141
320	15.5855	0	3.08642	6.17284	0	0	0	0	0	3.08642	0	0	0	0	466.049	18.5185	0	58.642	18.5185	0	0	0	0	182.099	27.7778	21.6049	3.08642	9.25926	55.5556	9.25926	0	0	0	0	0	0	0	0	3.08642	70.9877	0	3.08642	0	15.4321	0	6.17284	0	0	3.08642
330	15.9081	0	0	4.09836	0	8.19672	0	0	0	0	0	0	0	0	372.951	24.5902	0	53.2787	16.3934	0	0	0	0	229.508	12.2951	0	4.09836	16.3934	20.4918	12.2951	0	0	0	0	0	0	0	0	4.09836	176.23	0	8.19672	0	16.3934	0	0	0	0	0
340	16.2307	0	3.27869	9.83607	0	19.6721	0	0	0	3.27869	0	0	0	0	478.689	22.9508	0	32.7869	19.6721	0	0	0	0	180.328	13.1148	19.6721	3.27869	13.1148	62.2951	16.3934	0	0	3.27869	0	0	0	0	0	0	72.1311	0	0	0	9.83607	0	0	0	0	0
350	16.5533	0	0	9.61538	0	9.61538	0	0	0	3.20513	0	0	0	0	445.513	35.2564	0	51.2821	16.0256	0	0	0	0	118.59	25.641	6.41026	28.8462	3.20513	28.8462	19.2308	0	3.20513	16.0256	0	0	0	0	0	0	166.667	0	0	0	6.41026	0	0	0	0	0
360	16.8759	0	0	13.0719	0	9.80392	0	3.26797	6.53595	3.26797	0	0	0	0	460.784	49.0196	0	19.6078	19.6078	0	0	0	0	140.523	16.3399	6.53595	13.0719	0	45.7516	16.3399	0	0	9.80392	0	0	0	0	0	0	150.327	3.26797	0	0	0	0	0	0	0	0
370	17.1985	0	0	9.96678	0	23.2558	0	6.64452	0	0	0	0	0	0	478.405	49.8339	0	19.9336	26.5781	0	0	0	0	149.502	29.9003	19.9336	13.289	6.64452	36.5449	3.32226	0	0	9.96678	0	0	0	0	0	0	83.0565	0	0	0	3.32226	0	0	0	0	0
380	17.5211	0	2.89855	5.7971	0	17.3913	0	2.89855	5.7971	0	0	0	0	0	420.29	118.841	0	31.8841	26.087	0	0	0	0	147.826	14.4928	2.89855	23.1884	2.89855	23.1884	17.3913	0	0	5.7971	0	0	0	0	0	0	104.348	8.69565	0	0	14.4928	0	0	0	0	0
390	17.8437	0	0	3.22581	0	16.129	0	3.22581	6.45161	9.67742	0	0	0	0	487.097	64.5161	0	32.2581	22.5806	0	0	0	0	122.581	3.22581	3.22581	3.22581	19.3548	12.9032	9.67742	0	0	0	0	0	0	0	0	0	151.613	6.45161	3.22581	0	6.45161	0	0	0	0	0
400	18.1663	0	0	3.24675	0	16.2338	0	3.24675	9.74026	0	0	0	0	0	590.909	19.4805	0	16.2338	16.2338	3.24675	0	0	0	87.6623	25.974	0	3.24675	32.4675	6.49351	9.74026	0	0	0	0	0	0	0	0	16.2338	113.636	3.24675	3.24675	0	6.49351	0	0	0	0	3.24675
410	18.4889	0	0	6.53595	0	6.53595	0	3.26797	3.26797	0	0	0	0	0	509.804	35.9477	0	26.1438	22.8758	0	0	0	0	124.183	0	0	0	6.53595	16.3399	22.8758	0	3.26797	3.26797	0	0	0	0	0	0	176.471	3.26797	0	0	22.8758	0	0	0	0	0
420	18.8115	0	0	29.316	0	19.544	0	0	3.25733	0	0	0	0	0	504.886	19.544	0	22.8013	29.316	0	0	0	0	182.41	6.51466	0	3.25733	16.2866	0	13.0293	0	0	0	0	0	0	0	0	0	107.492	3.25733	9.77199	0	9.77199	0	0	0	0	6.51466
430	19.1341	0	3.32226	3.32226	0	9.96678	0	0	0	0	0	0	0	0	365.449	19.9336	0	13.289	16.6113	0	0	0	0	239.203	13.289	0	6.64452	16.6113	3.32226	23.2558	0	0	0	0	0	0	0	0	19.9336	209.302	3.32226	3.32226	3.32226	13.289	0	0	0	0	0
440	19.395	0	0	16.129	0	16.129	0	9.67742	0	3.22581	0	0	0	0	438.71	12.9032	0	19.3548	19.3548	0	0	0	6.45161	109.677	6.45161	0	3.22581	12.9032	0	16.129	0	0	3.22581	0	0	0	0	0	6.45161	254.839	6.45161	6.45161	0	6.45161	3.22581	0	0	0	0
450	19.6226	0	0	6.55738	0	3.27869	0	3.27869	6.55738	6.55738	0	0	0	0	445.902	26.2295	0	32.7869	9.83607	0	0	0	0	140.984	3.27869	3.27869	3.27869	16.3934	3.27869	32.7869	0	0	0	0	3.27869	0	0	0	3.27869	226.23	0	0	0	13.1148	0	0	0	0	0
460	19.8503	0	2.66667	8	0	8	0	0	0	5.33333	0	0	0	0	504	42.6667	0	34.6667	13.3333	0	0	0	2.66667	176	10.6667	0	8	24	2.66667	13.3333	0	0	2.66667	0	0	0	0	0	2.66667	114.667	0	0	0	10.6667	0	0	0	0	2.66667
470	20.0779	0	0	6.45161	0	22.5806	0	0	6.45161	3.22581	0	0	0	0	393.548	12.9032	0	12.9032	25.8065	0	0	0	0	129.032	9.67742	0	3.22581	22.5806	3.22581	0	0	0	0	0	0	0	0	0	22.5806	283.871	9.67742	6.45161	0	6.45161	0	0	0	0	6.45161
480	20.3056	0	0	18.6916	0	15.5763	0	0	3.11526	3.11526	0	0	0	0	417.445	21.8069	0	37.3832	18.6916	0	0	0	0	109.034	15.5763	3.11526	9.34579	15.5763	3.11526	12.4611	0	0	0	0	0	0	0	0	6.23053	271.028	0	3.11526	0	6.23053	0	0	0	0	0
490	20.5332	0	3.32226	6.64452	0	16.6113	0	0	0	0	0	0	0	0	441.86	13.289	0	23.2558	19.9336	0	0	0	0	109.635	13.289	0	3.32226	33.2226	0	13.289	0	0	6.64452	0	0	0	0	0	3.32226	259.136	3.32226	9.96678	0	13.289	0	0	0	0	3.32226
500	20.7609	0	0	6.45161	0	16.129	0	0	3.22581	3.22581	0	0	0	0	570.968	25.8065	0	29.0323	38.7097	0	0	0	0	132.258	9.67742	0	3.22581	16.129	6.45161	16.129	0	0	0	0	6.45161	0	0	0	0	93.5484	0	3.22581	0	6.45161	0	0	0	0	0
510	20.9885	0	0	13.0293	0	19.544	0	0	0	0	0	0	0	0	524.43	68.4039	0	29.316	22.8013	0	0	0	0	127.036	26.0586	0	6.51466	16.2866	3.25733	22.8013	0	0	3.25733	0	3.25733	0	0	0	3.25733	74.9186	6.51466	0	0	0	0	0	0	0	0
520	21.2162	0	3.33333	6.66667	0	13.3333	0	0	3.33333	3.33333	0	0	0	0	500	10	0	23.3333	20	0	0	0	3.33333	106.667	26.6667	0	10	33.3333	0	20	0	0	3.33333	0	0	0	0	0	0	170	3.33333	3.33333	0	0	0	0	0	0	6.66667
530	21.4438	0	0	6.66667	0	53.3333	0	0	0	3.33333	0	0	0	0	400	23.3333	0	16.6667	10	0	0	0	0	180	16.6667	0	6.66667	26.6667	3.33333	10	0	0	10	0	0	0	0	0	0	196.667	3.33333	0	0	6.66667	0	0	0	0	0
540	21.6715	0	0	3.1348	0	18.8088	0	0	3.1348	0	0	0	0	0	451.411	6.26959	0	40.7524	6.26959	0	0	0	0	163.009	40.7524	0	0	9.40439	0	31.348	0	0	3.1348	0	0	0	0	0	3.1348	181.818	9.40439	3.1348	0	6.26959	0	0	0	0	3.1348
550	21.8991	0	0	9.80392	0	6.53595	0	0	3.26797	6.53595	0	0	0	0	490.196	19.6078	0	16.3399	16.3399	0	0	0	0	192.81	19.6078	0	3.26797	16.3399	3.26797	9.80392	0	0	0	0	0	0	0	0	6.53595	147.059	0	0	0	6.53595	0	0	0	0	0
560	22.1268	0	0	3.125	0	9.375	0	0	0	3.125	3.125	0	0	0	453.125	15.625	0	18.75	6.25	0	0	0	0	193.75	21.875	0	3.125	53.125	3.125	6.25	0	0	0	0	3.125	0	0	0	9.375	171.875	0	6.25	0	0	0	0	0	0	0
570	22.3544	0	0	3.16456	0	9.49367	0	0	0	0	0	0	0	0	518.987	3.16456	0	22.1519	6.32911	6.32911	0	0	12.6582	205.696	28.481	0	3.16456	9.49367	3.16456	9.49367	0	0	0	0	0	0	0	0	0	136.076	3.16456	0	0	12.6582	0	0	0	0	0
580	22.5821	3.27869	3.27869	6.55738	0	6.55738	0	0	0	0	0	0	0	0	485.246	6.55738	0	22.9508	9.83607	0	0	0	0	180.328	22.9508	0	0	16.3934	6.55738	9.83607	0	0	0	0	6.55738	0	0	0	3.27869	163.934	9.83607	9.83607	0	0	3.27869	0	0	0	3.27869
590	22.8097	0	0	5.69801	0	8.54701	0	0	0	11.396	0	0	0	0	458.689	8.54701	0	39.886	2.849	0	0	0	0	225.071	54.1311	0	2.849	22.792	0	8.54701	0	0	0	0	0	0	0	0	5.69801	122.507	5.69801	5.69801	0	5.69801	0	0	0	0	0
600	23.0374	0	0	3.18471	0	12.7389	0	0	3.18471	0	0	0	0	0	382.166	28.6624	0	25.4777	3.18471	0	0	0	0	242.038	19.1083	0	3.18471	9.55414	3.18471	3.18471	0	0	0	0	0	0	0	0	3.18471	194.268	3.18471	12.7389	0	9.55414	0	9.55414	0	0	0
610	23.265	0	0	3.14465	0	3.14465	0	0	0	0	0	0	0	0	418.239	12.5786	0	22.0126	9.43396	0	0	0	3.14465	232.704	37.7358	0	6.28931	9.43396	3.14465	12.5786	0	3.14465	6.28931	0	3.14465	0	0	0	3.14465	154.088	9.43396	6.28931	0	6.28931	0	3.14465	0	0	0
620	23.4927	0	6.64452	6.64452	0	23.2558	0	3.32226	3.32226	6.64452	0	0	0	0	458.472	3.32226	0	26.5781	6.64452	0	0	0	3.32226	225.914	19.9336	0	3.32226	19.9336	3.32226	6.64452	0	0	0	0	6.64452	0	0	0	0	126.246	3.32226	9.96678	0	6.64452	0	13.289	0	0	0
630	23.7203	0	3.22581	9.67742	0	9.67742	0	0	0	0	0	0	6.45161	0	390.323	19.3548	0	22.5806	3.22581	0	0	0	0	283.871	6.45161	9.67742	3.22581	9.67742	25.8065	12.9032	0	0	3.22581	0	9.67742	0	0	0	6.45161	138.71	0	3.22581	0	0	3.22581	3.22581	0	0	0
640	23.9653	6.55738	0	16.3934	0	22.9508	0	0	0	0	0	0	0	0	337.705	29.5082	0	39.3443	0	0	0	0	3.27869	236.066	22.9508	9.83607	9.83607	3.27869	36.0656	9.83607	0	0	0	0	6.55738	0	0	0	0	180.328	0	0	0	13.1148	0	3.27869	0	0	0
650	24.2197	0	2.97619	2.97619	0	5.95238	0	0	0	0	0	0	0	0	598.214	11.9048	0	29.7619	0	0	0	0	0	166.667	35.7143	8.92857	0	2.97619	5.95238	11.9048	0	0	2.97619	0	11.9048	0	0	0	8.92857	56.5476	5.95238	2.97619	0	2.97619	2.97619	5.95238	0	0	0
660	24.4741	3.10559	0	9.31677	0	3.10559	0	0	0	3.10559	0	0	0	0	596.273	15.528	0	24.8447	0	0	0	0	3.10559	189.441	24.8447	0	9.31677	0	3.10559	15.528	0	0	3.10559	0	0	0	0	0	3.10559	62.1118	3.10559	6.21118	0	3.10559	0	3.10559	0	0	0
670	24.7284	6.64452	0	23.2558	0	3.32226	0	0	0	3.32226	0	0	0	0	458.472	19.9336	0	26.5781	3.32226	0	0	0	3.32226	202.658	13.289	0	3.32226	6.64452	3.32226	13.289	0	3.32226	0	0	3.32226	0	0	0	9.96678	142.857	6.64452	6.64452	0	9.96678	3.32226	3.32226	0	0	3.32226
680	24.9828	0	3.25733	13.0293	0	13.0293	0	6.51466	0	0	3.25733	0	0	0	403.909	22.8013	0	26.0586	6.51466	0	0	3.25733	0	296.417	16.2866	6.51466	6.51466	6.51466	3.25733	13.0293	0	0	0	0	0	0	0	0	0	130.293	3.25733	0	0	0	0	3.25733	0	0	0
690	25.2372	0	0	4.11523	0	20.5761	0	4.11523	4.11523	0	0	0	0	0	366.255	24.6914	0	12.3457	8.23045	0	0	0	4.11523	288.066	28.8066	12.3457	0	8.23045	12.3457	16.4609	0	0	0	0	4.11523	0	0	0	12.3457	135.802	8.23045	4.11523	0	4.11523	0	0	0	0	0
700	25.4916	0	0	16.5563	0	19.8675	0	0	6.62252	6.62252	0	0	0	0	370.861	29.8013	0	23.1788	6.62252	0	0	0	0	327.815	26.4901	23.1788	9.93377	13.245	13.245	16.5563	0	0	6.62252	0	0	0	0	0	6.62252	56.2914	0	0	0	3.31126	0	3.31126	0	0	0
710	25.7459	0	0	3.14465	0	15.7233	0	0	0	0	3.14465	0	0	0	455.975	28.3019	0	37.7358	0	0	0	0	0	261.006	31.4465	6.28931	6.28931	9.43396	12.5786	15.7233	0	6.28931	9.43396	0	3.14465	0	0	0	0	47.1698	3.14465	12.5786	0	9.43396	0	3.14465	0	0	0
720	26.0003	0	0	0	0	16.1943	0	0	4.04858	0	0	0	0	0	259.109	16.1943	0	16.1943	0	0	0	0	0	323.887	24.2915	4.04858	4.04858	24.2915	4.04858	12.1457	0	8.09717	4.04858	0	4.04858	0	0	0	8.09717	182.186	16.1943	16.1943	0	20.2429	0	8.09717	0	0	4.04858
730	26.2547	0	0	0	0	3.28947	0	0	3.28947	0	0	0	0	0	401.316	6.57895	0	29.6053	3.28947	0	0	0	0	332.237	26.3158	3.28947	13.1579	9.86842	3.28947	3.28947	0	0	0	0	3.28947	0	0	0	0	115.132	3.28947	3.28947	6.57895	6.57895	0	3.28947	0	0	0
740	26.509	3.31126	0	3.31126	0	23.1788	0	0	3.31126	3.31126	0	0	0	0	447.02	6.62252	0	16.5563	0	0	0	0	0	258.278	26.4901	0	6.62252	16.5563	3.31126	16.5563	0	3.31126	0	0	6.62252	0	0	0	9.93377	96.0265	0	3.31126	0	13.245	0	9.93377	0	0	0
750	26.7634	0	0	3.18471	0	15.9236	0	0	0	0	0	0	0	0	385.35	6.36943	0	3.18471	0	0	0	3.18471	0	331.21	35.0318	0	3.18471	28.6624	0	19.1083	0	0	0	0	3.18471	0	0	0	0	85.9873	6.36943	12.7389	0	3.18471	0	15.9236	0	0	3.18471
760	27.0178	0	0	4.329	0	8.65801	0	0	4.329	4.329	0	0	0	0	298.701	21.645	0	8.65801	4.329	0	0	0	0	454.545	21.645	4.329	0	25.974	0	17.316	0	0	0	0	12.987	0	0	0	0	60.6061	8.65801	12.987	0	0	0	0	0	0	0
770	27.2721	0	0	0	0	5.81395	0	0	0	0	0	0	0	0	168.605	2.90698	0	14.5349	0	0	0	0	0	558.14	40.6977	14.5349	5.81395	11.6279	0	14.5349	0	0	0	0	0	0	0	0	2.90698	90.1163	11.6279	11.6279	0	2.90698	0	5.81395	0	0	0
790	27.7959	0	5.2356	0	0	10.4712	0	0	0	0	5.2356	0	0	0	350.785	10.4712	0	5.2356	0	0	0	0	0	382.199	36.6492	10.4712	15.7068	26.178	0	15.7068	0	0	0	0	10.4712	0	0	0	10.4712	62.8272	5.2356	0	0	0	0	10.4712	0	0	0
800	28.1253	3.02115	0	6.0423	0	3.02115	0	0	0	3.02115	0	0	0	0	138.973	12.0846	0	9.06344	0	0	0	0	0	637.462	9.06344	6.0423	9.06344	9.06344	0	0	0	0	0	0	12.0846	0	0	0	0	51.3595	6.0423	15.1057	0	3.02115	0	3.02115	0	0	3.02115
810	28.4547	0	0	0	0	0	0	0	0	0	0	0	0	0	146.617	7.5188	0	11.2782	0	0	0	0	0	710.526	30.0752	0	7.5188	11.2782	0	7.5188	0	0	0	0	0	0	0	0	0	45.1128	0	0	0	0	0	0	0	0	0
820	28.7841	0	0	5.61798	0	11.236	0	0	0	0	0	0	0	0	123.596	11.236	0	5.61798	5.61798	0	0	0	0	584.27	16.8539	0	0	16.8539	0	16.8539	0	0	5.61798	0	0	0	0	0	5.61798	106.742	11.236	5.61798	0	5.61798	0	0	0	0	0
840	29.5935	3.03951	0	60.7903	0	0	0	3.03951	6.07903	0	0	0	0	0	227.964	36.4742	0	60.7903	0	0	0	0	0	316.109	18.2371	3.03951	9.11854	45.5927	6.07903	6.07903	0	0	0	0	15.1976	0	0	0	6.07903	106.383	3.03951	3.03951	0	18.2371	0	6.07903	0	0	0
850	30.0065	3.10559	0	9.31677	0	15.528	0	0	3.10559	0	0	0	0	0	270.186	55.9006	0	59.0062	0	0	0	0	0	273.292	34.1615	0	12.4224	105.59	3.10559	9.31677	0	0	3.10559	0	0	0	0	0	3.10559	55.9006	3.10559	3.10559	0	24.8447	0	24.8447	0	0	0
860	30.4196	0	0	10.4167	0	5.20833	0	0	10.4167	0	0	0	5.20833	0	197.917	93.75	0	36.4583	0	0	0	5.20833	0	244.792	36.4583	0	0	140.625	5.20833	5.20833	0	0	0	0	0	0	0	0	5.20833	78.125	15.625	5.20833	0	31.25	0	5.20833	0	0	0
870	30.8027	0	11.0497	5.52486	0	16.5746	0	0	11.0497	0	0	0	0	0	419.89	33.1492	0	16.5746	0	0	0	0	0	226.519	33.1492	0	0	93.9227	0	11.0497	0	5.52486	5.52486	0	0	0	0	0	0	60.7735	11.0497	0	0	5.52486	0	0	0	0	0
880	31.0663	3.21543	0	19.2926	0	12.8617	0	0	3.21543	0	0	0	0	0	327.974	16.0772	0	41.8006	3.21543	0	0	0	0	218.65	22.508	0	6.43087	73.955	3.21543	6.43087	0	3.21543	3.21543	0	16.0772	0	0	0	9.6463	109.325	12.8617	12.8617	0	38.5852	0	9.6463	0	0	6.43087
890	31.3298	3.03951	0	3.03951	0	18.2371	0	0	18.2371	3.03951	0	0	0	0	373.86	54.7112	0	6.07903	0	0	0	0	3.03951	270.517	18.2371	3.03951	12.1581	97.2644	6.07903	18.2371	0	0	0	0	6.07903	0	0	0	0	36.4742	9.11854	3.03951	0	15.1976	0	3.03951	0	0	0
899	31.5671	0	0	3.27869	0	3.27869	0	0	9.83607	0	3.27869	0	0	0	311.475	19.6721	0	13.1148	3.27869	0	0	0	0	360.656	22.9508	0	19.6721	68.8525	0	22.9508	0	3.27869	0	0	9.83607	0	0	0	13.1148	68.8525	9.83607	0	0	3.27869	0	9.83607	0	0	0
910	31.857	0	0	3.14465	0	0	0	0	0	6.28931	0	0	0	0	179.245	37.7358	0	6.28931	0	0	0	0	0	500	31.4465	0	3.14465	72.327	0	22.0126	0	0	0	0	6.28931	0	0	0	6.28931	59.7484	6.28931	9.43396	0	9.43396	0	0	0	0	0
925	32.2523	0	0	6.36943	0	9.55414	0	0	0	0	0	0	0	0	181.529	3.18471	0	6.36943	0	0	0	0	3.18471	592.357	19.1083	0	0	70.0637	0	19.1083	0	0	0	0	6.36943	0	0	0	0	60.5096	3.18471	3.18471	0	0	0	0	0	0	0
935	32.5316	3.27869	0	0	0	0	0	0	0	0	0	0	0	0	498.361	22.9508	0	9.83607	3.27869	0	0	0	0	236.066	32.7869	0	6.55738	85.2459	0	26.2295	0	3.27869	0	0	0	0	0	0	0	39.3443	0	6.55738	0	6.55738	0	0	0	0	0
952	33.0863	3.02115	0	3.02115	0	0	0	0	6.0423	0	0	0	0	0	519.637	33.2326	0	18.1269	0	0	0	0	0	111.782	45.3172	0	3.02115	60.423	3.02115	30.2115	0	0	0	0	3.02115	0	0	0	12.0846	69.4864	15.1057	3.02115	0	27.1903	0	0	0	0	0
965	33.5105	0	3.38983	0	0	6.77966	0	0	3.38983	6.77966	0	0	0	0	555.932	10.1695	0	30.5085	0	0	0	0	3.38983	98.3051	33.8983	0	6.77966	81.3559	0	23.7288	0	0	3.38983	0	3.38983	0	0	0	10.1695	54.2373	10.1695	16.9492	0	3.38983	0	0	0	0	0
980	33.9386	0	0	3.25733	0	0	0	0	6.51466	0	0	0	0	0	622.15	42.3453	0	13.0293	3.25733	0	0	0	0	84.6906	22.8013	3.25733	6.51466	29.316	0	29.316	0	0	3.25733	0	3.25733	0	0	0	0	61.8893	3.25733	3.25733	0	9.77199	0	13.0293	0	0	0
1000	34.4619	0	0	0	0	2.77008	0	0	2.77008	0	2.77008	0	0	0	526.316	8.31025	0	8.31025	0	0	0	0	0	163.435	36.0111	0	2.77008	80.3324	0	16.6205	0	0	0	0	5.54017	0	0	0	5.54017	55.4017	13.8504	8.31025	0	8.31025	0	2.77008	0	0	0
1010	34.7235	0	0	0	0	5.8651	0	0	0	2.93255	2.93255	0	0	0	563.05	8.79765	0	5.8651	5.8651	0	0	0	2.93255	114.37	79.1789	0	0	43.9883	0	17.5953	0	0	0	0	0	0	0	0	0	49.8534	23.4604	5.8651	0	11.7302	0	11.7302	0	0	0
1020	34.9852	0	0	0	0	6.38978	0	0	12.7796	3.19489	0	0	0	0	392.971	9.58466	0	12.7796	3.19489	0	0	0	0	194.888	25.5591	0	0	38.3387	0	54.3131	0	0	0	0	6.38978	0	0	0	9.58466	111.821	12.7796	9.58466	3.19489	19.1693	0	3.19489	0	0	0
1030	35.2468	4.1841	0	0	0	0	0	0	8.3682	0	0	0	0	0	372.385	12.5523	0	16.7364	0	0	0	0	4.1841	184.1	37.6569	0	0	37.6569	0	41.841	0	0	0	0	16.7364	0	0	0	0	125.523	54.3933	16.7364	0	12.5523	0	4.1841	0	0	0
1040	35.4844	0	0	0	0	3.1746	0	0	0	0	0	0	0	0	558.73	9.52381	0	22.2222	0	0	0	0	3.1746	155.556	38.0952	0	0	19.0476	0	34.9206	0	0	3.1746	0	3.1746	0	0	0	0	57.1429	6.34921	15.873	0	12.6984	0	6.34921	0	0	6.34921
1055	35.7566	0	0	4.72813	0	0	0	0	2.36407	0	0	0	0	0	754.137	47.2813	0	11.8203	0	2.36407	0	0	0	44.9173	14.1844	0	0	14.1844	2.36407	14.1844	0	0	0	0	7.0922	0	0	0	0	42.5532	0	4.72813	0	11.8203	0	4.72813	0	0	4.72813
1069	36.0107	0	0	0	0	0	0	0	0	0	0	0	0	0	713.528	18.5676	0	21.2202	0	0	0	2.65252	2.65252	42.4403	7.95756	0	13.2626	39.7878	0	21.2202	0	0	0	0	15.9151	0	0	0	0	39.7878	5.30504	18.5676	0	10.6101	0	0	0	0	0
1080	36.2103	0	0	0	0	1.07991	0	0	0	0	0	0	0	0	860.691	6.47948	0	8.63931	0	0	0	0	0	22.6782	4.31965	0	0	16.1987	0	12.959	0	0	0	0	6.47948	0	0	0	2.15983	28.0778	2.15983	8.63931	0	8.63931	0	0	0	0	0
1090	36.3917	0	0	0	0	0	0	0	0	0	0	0	0	0	912.685	0	0	20.5931	0	0	0	0	0	21.4168	6.58979	0	1.64745	8.23723	0	4.94234	0	0	0	0	5.76606	0	0	0	0.823723	6.58979	0.823723	0.823723	0	2.47117	0	0	0	0	0
1100	36.5732	0	0	2.26757	0	0	0	0	1.13379	0	0	0	0	0	892.29	6.80272	0	12.4717	1.13379	0	0	0	0	21.542	6.80272	0	4.53515	11.3379	0	5.66893	0	0	0	0	3.40136	0	0	0	2.26757	4.53515	0	0	0	11.3379	0	1.13379	0	0	0
1110	36.7546	0	0	0	0	0	0	0	1.0929	0	0	0	0	0	913.661	1.0929	0	24.0437	0	0	0	0	2.18579	7.65027	3.27869	0	1.0929	2.18579	0	13.1148	0	0	0	0	4.37158	0	0	0	0	13.1148	1.0929	2.18579	0	4.37158	0	2.18579	0	0	0
1120	36.9361	0	0	0	0	0	0	0	0	0	0	0	0	0	871.56	3.66972	0	40.367	0	0	0	0	0	18.3486	7.33945	0	1.83486	9.17431	0	12.844	0	0	0	0	0	0	0	0	0	20.1835	1.83486	1.83486	0	1.83486	0	0	0	0	0
1130	37.1175	0	0	0	0	1.18624	0	0	0	0	0	0	0	0	880.19	0	0	9.48992	0	0	0	0	2.37248	20.1661	3.55872	0	1.18624	10.6762	2.37248	9.48992	0	0	0	0	2.37248	0	0	0	3.55872	39.1459	1.18624	1.18624	0	0	0	0	0	0	0
1140	37.299	0	0	1.05708	0	1.05708	0	0	0	1.05708	0	0	1.05708	0	902.748	0	0	6.34249	0	0	0	0	1.05708	17.9704	4.22833	0	0	9.51374	0	5.28541	0	0	1.05708	0	2.11416	0	0	0	1.05708	21.1416	4.22833	3.17125	0	3.17125	0	3.17125	0	0	0
1150	37.4805	0	0	2.60417	0	2.60417	0	0	2.60417	0	0	0	0	0	729.167	2.60417	0	39.0625	5.20833	0	0	0	0	26.0417	15.625	0	0	28.6458	0	15.625	0	0	0	0	7.8125	0	0	0	5.20833	49.4792	13.0208	2.60417	0	20.8333	0	10.4167	0	0	0
1160	37.6619	0	0	6.55738	0	0	0	0	0	0	0	0	0	0	573.77	3.27869	0	65.5738	0	0	0	0	0	88.5246	16.3934	0	3.27869	36.0656	0	29.5082	0	0	0	0	19.6721	0	0	0	6.55738	62.2951	32.7869	3.27869	0	16.3934	0	13.1148	0	0	0
1170	37.8434	0	6.75676	6.75676	0	6.75676	0	0	0	0	0	0	6.75676	0	486.486	0	0	27.027	0	0	0	0	0	94.5946	0	0	0	47.2973	0	20.2703	0	0	6.75676	0	108.108	0	0	0	13.5135	94.5946	13.5135	13.5135	6.75676	13.5135	0	6.75676	0	0	0
1180	38.0248	0	0	6.0241	0	6.0241	0	0	0	0	0	0	6.0241	0	433.735	0	0	36.1446	0	0	0	0	0	42.1687	0	0	6.0241	30.1205	6.0241	42.1687	0	0	0	0	66.2651	0	0	0	24.0964	222.892	0	12.0482	0	30.1205	0	6.0241	0	0	12.0482
1200	38.4522	0	0	85.2941	0	5.88235	0	0	2.94118	0	0	0	0	0	497.059	20.5882	0	23.5294	0	0	0	0	0	164.706	17.6471	0	8.82353	8.82353	50	8.82353	0	0	0	0	26.4706	0	0	0	0	55.8824	2.94118	0	0	11.7647	0	0	0	0	0
1210	38.6873	3.07692	0	64.6154	0	6.15385	0	0	0	0	0	0	0	0	452.308	18.4615	0	9.23077	3.07692	0	0	0	0	153.846	15.3846	6.15385	6.15385	18.4615	6.15385	12.3077	0	0	0	0	21.5385	0	0	0	3.07692	150.769	12.3077	0	0	12.3077	0	0	0	0	0
1220	38.9225	0	0	24.9221	0	3.11526	0	0	3.11526	0	0	0	0	0	467.29	12.4611	0	15.5763	0	0	0	0	3.11526	280.374	12.4611	6.23053	12.4611	15.5763	0	15.5763	0	0	0	0	6.23053	0	0	0	0	71.6511	9.34579	0	0	9.34579	0	3.11526	0	0	3.11526
1229	39.1341	3.28947	3.28947	13.1579	0	0	0	0	0	0	0	0	0	0	467.105	26.3158	0	13.1579	0	0	0	0	0	226.974	3.28947	3.28947	6.57895	9.86842	6.57895	9.86842	0	0	0	0	36.1842	0	0	0	6.57895	88.8158	19.7368	19.7368	0	9.86842	0	6.57895	0	0	0
1252	39.675	0	0	0	0	0	0	0	0	0	0	0	0	0	883.372	2.30947	0	10.3926	0	0	0	0	0	23.0947	6.92841	0	0	13.8568	0	8.08314	0	0	0	0	2.30947	0	0	0	1.15473	33.4873	4.61894	5.77367	0	1.15473	0	0	0	0	0
1260	39.8631	0	0.84674	0	0	0.84674	0	0	0.84674	0	0.84674	0	0	0.84674	911.092	0.84674	0	2.54022	0	0	0	0	0	16.0881	3.38696	0	0.84674	12.7011	0	4.2337	0	0.84674	0	0	3.38696	0	0	0	0	22.0152	4.2337	7.62066	0	0.84674	0	0	0	0	0
1323	40.7925	0	0	14.0845	0	0	0	0	2.8169	5.6338	2.8169	0	0	0	383.099	59.1549	0	22.5352	0	0	0	0	0	140.845	25.3521	0	2.8169	169.014	0	50.7042	0	0	0	0	5.6338	0	0	0	5.6338	53.5211	8.4507	2.8169	0	8.4507	0	0	0	0	0
1350	41.1435	0	0	2.97619	0	5.95238	0	0	2.97619	2.97619	0	0	0	0	383.929	8.92857	0	35.7143	0	0	0	0	2.97619	321.429	20.8333	0	2.97619	71.4286	2.97619	14.881	0	0	2.97619	0	5.95238	0	0	0	0	50.5952	5.95238	17.8571	0	5.95238	0	0	0	0	0
1360	41.2735	0	0	2.77778	0	0	0	0	2.77778	0	0	0	0	0	333.333	0	0	27.7778	0	0	0	0	0	416.667	5.55556	5.55556	2.77778	55.5556	0	33.3333	0	0	0	0	0	0	0	0	0	36.1111	27.7778	16.6667	0	2.77778	0	2.77778	0	0	0
1370	41.4035	0	0	0	0	0	0	0	0	3.34448	0	0	0	0	481.605	6.68896	0	26.7559	0	0	0	0	0	153.846	23.4114	0	3.34448	163.88	0	36.7893	0	0	3.34448	0	16.7224	0	0	0	3.34448	43.4783	3.34448	6.68896	0	3.34448	0	3.34448	0	0	0
1400	41.761	0	0	23.9521	0	2.99401	0	0	0	0	0	0	0	0	631.737	14.9701	0	50.8982	5.98802	0	0	0	2.99401	134.731	26.9461	5.98802	5.98802	32.9341	0	17.9641	0	0	0	0	5.98802	0	0	0	0	14.9701	0	0	0	14.9701	0	2.99401	0	0	0
1430	42.118	0	0	2.84091	0	5.68182	0	2.84091	5.68182	0	2.84091	0	0	0	414.773	25.5682	0	14.2045	2.84091	0	0	0	0	99.4318	25.5682	0	2.84091	198.864	0	45.4545	0	0	0	0	5.68182	0	0	0	2.84091	79.5455	11.3636	14.2045	0	19.8864	0	0	0	0	0
1440	42.237	0	0	0	0	3.1348	3.1348	0	6.26959	0	0	0	0	0	410.658	72.1003	0	9.40439	0	0	0	0	3.1348	103.448	56.4263	0	12.5392	100.313	0	37.6176	0	0	0	0	6.26959	0	0	0	3.1348	72.1003	15.674	3.1348	0	28.2132	0	6.26959	0	0	0
1450	42.3559	0	0	3.46021	0	3.46021	0	0	3.46021	6.92042	0	0	0	0	346.021	48.4429	0	6.92042	0	0	0	0	3.46021	145.329	27.6817	0	0	152.249	3.46021	44.9827	0	0	0	0	17.301	0	0	0	3.46021	96.8858	3.46021	6.92042	3.46021	27.6817	0	6.92042	0	0	0
1460	42.4749	0	0	0	0	0	0	0	5.93472	0	0	0	0	0	427.3	71.2166	0	14.8368	0	0	0	0	5.93472	154.303	35.6083	0	11.8694	32.6409	2.96736	20.7715	0	0	0	0	17.8042	0	0	0	2.96736	86.0534	23.7389	2.96736	0	20.7715	0	11.8694	0	0	0
1472.5	42.6237	0	0	0	0	0	0	0	0	3.18471	0	0	3.18471	0	369.427	28.6624	0	22.293	0	0	0	0	3.18471	178.344	44.586	0	3.18471	85.9873	3.18471	50.9554	0	0	0	0	12.7389	0	0	0	22.293	79.6178	19.1083	19.1083	0	15.9236	0	0	0	0	0
1482	42.7367	0	0	3.14465	0	0	0	0	3.14465	0	0	0	0	3.14465	339.623	50.3145	0	44.0252	3.14465	0	0	0	0	163.522	37.7358	0	3.14465	94.3396	0	34.5912	0	0	0	0	15.7233	0	0	0	9.43396	66.0377	34.5912	6.28931	0	40.8805	0	3.14465	0	0	0
1490	42.8319	0	0	3.28947	0	0	0	0	3.28947	0	0	0	0	0	276.316	16.4474	0	75.6579	0	0	0	0	0	105.263	72.3684	0	3.28947	240.132	0	32.8947	0	0	0	0	9.86842	0	0	0	3.28947	59.2105	23.0263	16.4474	0	26.3158	0	6.57895	0	0	0
1499	42.939	0	0	0	0	0	0	0	0	6.53595	0	0	0	0	336.601	32.6797	0	84.9673	0	0	0	0	0	222.222	45.7516	0	6.53595	58.8235	0	6.53595	0	0	0	0	13.0719	0	0	0	13.0719	71.8954	35.9477	3.26797	0	16.3399	0	6.53595	0	0	0
1510	43.0699	0	0	0	0	11.4943	0	0	0	0	0	0	3.83142	0	455.939	11.4943	0	49.8084	0	0	0	0	0	145.594	34.4828	3.83142	0	61.3027	3.83142	57.4713	0	0	0	0	34.4828	0	0	0	3.83142	57.4713	22.9885	7.66284	0	11.4943	0	3.83142	0	0	0
1520	43.1889	0	0	0	0	0	0	0	0	7.75194	0	0	0	0	465.116	15.5039	0	38.7597	0	7.75194	0	0	0	155.039	31.0078	0	7.75194	93.0233	0	15.5039	0	0	0	0	15.5039	0	0	0	15.5039	77.5194	0	15.5039	0	15.5039	0	7.75194	0	0	0
1530	43.3124	0	0	0	0	0	0	0	5.37634	0	0	0	0	0	634.409	0	0	10.7527	5.37634	0	0	0	0	75.2688	32.2581	0	0	53.7634	0	16.129	0	0	5.37634	0	5.37634	0	0	0	5.37634	48.3871	26.8817	37.6344	0	16.129	0	5.37634	0	0	0
1575	43.9836	0	0	5.87084	0	0	0	0	0	1.95695	0	0	0	0	774.951	23.4834	0	3.91389	0	0	0	0	0	50.8806	23.4834	0	9.78474	17.6125	0	3.91389	0	1.95695	0	0	0	0	0	0	5.87084	35.225	9.78474	3.91389	0	5.87084	0	1.95695	0	0	0
1583	44.1029	0	0	0	0	1.96464	0	0	3.92927	1.96464	0	0	0	0	791.749	11.7878	0	13.7525	0	0	0	0	0	78.5855	19.6464	0	0	15.7171	0	1.96464	0	0	0	0	0	0	0	0	0	15.7171	9.82318	3.92927	0	1.96464	0	1.96464	0	0	0
1592	44.2371	0	0	0.88574	0	0	0	0	3.54296	0.88574	0	0	0	0	869.796	5.31444	0	5.31444	0	0	0	0	0	38.0868	21.2578	0	4.4287	11.5146	0	4.4287	0	0	0	0	0	0	0	0	0.88574	8.8574	1.77148	2.65722	0.88574	7.08592	0	1.77148	0	0	0
1601	44.3714	0.538213	0.538213	0.538213	0	0.538213	0	0	0	0	0	0	0	0	941.335	4.30571	0	2.15285	0.538213	0	0	0	0	19.3757	6.45856	0	0	3.22928	0	1.61464	0	0	0	0	1.07643	0	0	0	0	9.68784	2.69107	0	0	3.22928	0	1.61464	0	0	0
1609	44.4907	1.72414	0	0	0	0	0	0	0	0	0	0	0	0	791.379	6.89655	0	3.44828	0	0	0	0	0	51.7241	34.4828	0	3.44828	37.931	0	15.5172	0	0	0	0	1.72414	0	0	0	1.72414	22.4138	10.3448	0	0	8.62069	0	1.72414	0	0	0
1621	44.6697	0	0	0.853971	0	0.853971	0	0	0.853971	0	0.853971	0	0	0	900.085	3.41588	0	1.70794	0	0	0	0	0	29.035	14.5175	0	0.853971	5.9778	0	9.39368	0	0.853971	0	0	3.41588	0	0	0	0.853971	11.9556	2.56191	4.26985	0	3.41588	0	0.853971	0	0	0
1630	44.8039	0	0	0	0	0	0	0	0.588582	0	0.588582	0	0	0	930.547	4.12007	0	2.94291	0	0	0	0	0.588582	21.1889	7.06298	0	0	5.88582	0.588582	2.35433	0	0	0	0	0	0	0	0	0.588582	10.0059	3.53149	0.588582	0	1.17716	0	0.588582	0	0	0
1640	44.9531	0	0	1.02564	0	0	0	0	0	0	0	0	0	0	946.667	7.69231	0	1.02564	0	0	0	0	0	11.7949	3.58974	0	0	8.20513	0	3.58974	0	0	0	0	0	0	0	0	0.512821	6.66667	2.5641	0.512821	0.512821	1.02564	0	0.512821	0	0	0
1650	45.1022	0	0	0	0	2.77008	0	0	0	0	0	0	0	0	923.823	9.00277	0	4.15512	0.692521	0	0	0	0	22.8532	4.84765	0	0	8.31025	0	3.4626	0	0	0	0	0	0	0	0	0.692521	6.23269	2.07756	2.77008	0	2.77008	0	2.07756	0	0	0
1660	45.2514	0	0	0.552181	0	0	0	0	1.10436	0	0	0	0	0	941.469	4.41745	0	4.41745	0	0	0	0	0	12.7002	3.31309	0	0.552181	9.93926	0	5.52181	0	0	0	0	0	0	0	0	0	6.07399	1.65654	0	0	1.65654	0	0	0	0	0
1673	45.4453	0	0	0	0	0.834725	0	0	0	1.66945	0	0	0	0	904.007	7.51252	0	5.00835	0	0	0	0	0.834725	19.1987	8.34725	1.66945	1.66945	8.34725	0	3.3389	0	0	0	0	1.66945	0	0	0	2.50417	15.8598	2.50417	3.3389	0	0.834725	0	0.834725	0	0	0
1680	45.5497	0	0	0.517598	0	0	0	0.517598	0.517598	0	0.517598	0	0	0	946.687	5.69358	0	2.07039	0	0	0	0	0	12.4224	0.517598	0	0	8.79917	0	4.14079	0	0	0	0	0.517598	0	0	0	0.517598	7.24638	1.5528	2.58799	0	1.0352	0	0	0	0	0
1690	45.6988	0	0	0	0	0	0	0	1.65563	0	0	0	0	0	915.563	0	0	5.7947	0.827815	0	0	0	0	21.5232	3.31126	0	0	16.5563	0	8.27815	0	0	0	0	0.827815	0	0	0	0.827815	9.93377	4.96689	0	0	2.48344	0	0	0	0	0
1700	45.848	0	0	1.8018	0	1.8018	0	0	5.40541	0	0	0	0	0	821.622	18.018	0	9.00901	0	0	0	0	0	32.4324	10.8108	0	3.6036	28.8288	0	5.40541	0	0	0	0	0	0	0	0	0	30.6306	5.40541	3.6036	0	7.20721	0	0	0	0	0
1710	45.9971	1.59744	1.59744	1.59744	0	0	0	0	7.98722	0	0	0	0	0	832.268	4.79233	0	6.38978	1.59744	0	0	0	0	36.7412	9.58466	0	0	25.5591	0	7.98722	0	0	0	0	3.19489	0	0	0	1.59744	17.5719	4.79233	3.19489	0	7.98722	0	6.38978	0	0	0
1720	46.1463	0	0	1.33869	0	1.33869	0	0	2.67738	1.33869	0	0	0	0	856.76	21.419	0	4.01606	0	0	0	0	1.33869	21.419	2.67738	0	1.33869	33.4672	0	9.37082	0	0	0	0	1.33869	0	0	0	1.33869	17.4029	4.01606	0	0	2.67738	0	0	0	0	0
1730	46.2954	0	0	2.35294	0	0	0	0	4.70588	0	0	0	0	0	776.471	0	0	16.4706	0	0	0	0	0	51.7647	2.35294	0	0	49.4118	0	4.70588	0	0	0	0	4.70588	0	0	0	4.70588	44.7059	0	4.70588	0	11.7647	0	2.35294	0	0	0
1740	46.4446	0	0	4.21053	0	2.10526	0	0	2.10526	0	0	0	0	0	760	0	0	21.0526	0	0	0	0	0	50.5263	8.42105	0	10.5263	56.8421	0	35.7895	0	0	2.10526	0	0	0	0	0	0	12.6316	2.10526	2.10526	0	8.42105	0	4.21053	0	0	0
1750	46.5937	0	0	16.7866	0	0	0	0	0	2.39808	0	0	0	0	743.405	0	0	21.5827	0	0	0	0	0	71.9424	16.7866	2.39808	4.79616	16.7866	0	16.7866	0	0	2.39808	0	4.79616	0	0	0	0	38.3693	2.39808	4.79616	0	7.19424	0	0	0	0	0
1758	46.7131	0	0	2.74725	0	2.74725	0	0	2.74725	0	0	0	0	0	741.758	0	0	30.2198	0	0	0	0	2.74725	68.6813	13.7363	0	5.49451	16.4835	0	32.967	0	0	5.49451	0	5.49451	0	0	0	0	43.956	2.74725	8.24176	0	5.49451	0	0	0	0	0
1806	48.0465	0	0	64.2202	0	9.17431	0	0	6.11621	0	0	0	0	0	681.957	9.17431	0	3.0581	0	0	0	0	0	103.976	15.2905	6.11621	6.11621	6.11621	3.0581	18.3486	0	0	0	0	12.2324	0	0	0	0	27.5229	0	0	0	3.0581	0	0	0	0	0
1816	48.3445	0	0	132.686	0	0	0	0	0	0	0	0	0	0	514.563	9.70874	0	16.1812	0	0	0	0	0	174.757	19.4175	3.23625	6.47249	12.945	3.23625	55.0162	0	3.23625	0	0	3.23625	0	0	0	0	19.4175	0	3.23625	0	3.23625	0	0	0	0	0
1844		0	0	2.34192	0	2.34192	0	0	0	0	0	0	0	0	751.756	11.7096	0	14.0515	2.34192	0	0	2.34192	0	88.993	11.7096	0	0	4.68384	0	39.8126	0	0	2.34192	0	0	0	0	0	4.68384	14.0515	7.02576	4.68384	0	23.4192	0	2.34192	0	0	0
[truncated: 61 more columns]

## Sheet: MD99-2339 Voelker et al., 2006 
VOELKER et al., 2006	depth (cm)	age cal ka BP	% N. pachy. (s)		prof	age cal ka BP	d180plank		Depth	Age	mean grain size of total fraction <63µm		Depth	SedRates	Age
for the data	20	0.593895	0.4		30	0.898456	0.13		17.5	0.517754	8.074			(cm/ka)	(ka BP)
	30	0.898456	0		37.5	1.12688	0.37		22	0.654807	10.94		0.5	32.8341	0
PENAUD et al., 2016	40	1.20302	0		40	1.20302	-0.05		27	0.807088	9.254		57.5	32.8341	1.736
for the age model	50	1.50758	0.36		50	1.50758	0.25		32	0.959368	8.359		57.5	22.9542	1.736
related to the data	57.5	1.736	0		57.5	1.736	0.33		37.5	1.12688	9.367		157.5	22.9542	6.0925
	60	1.84491	0		60	1.84491	0.17		42	1.26393	10.47		157.5	9.25926	6.0925
	70	2.28056	0		77.5	2.6073	0.53		47	1.41621	10.97		180	9.25926	8.5225
	82	2.80334	0		78	2.62908	0.48		52	1.56849	12.28		180	10.2208	8.5225
	90	3.15186	0		90	3.15186	0.61		57.5	1.736	9.613		217.5	10.2208	12.1915
	97.5	3.4786	0		98	3.50038	0.58		62	1.93204	13.01		217.5	29.6589	12.1915
	110	4.02316	0		110	4.02316	0.18		67	2.14987	13.88		277.5	29.6589	14.2145
	130	4.89446	0		130	4.89446	0.36		72	2.36769	12.73		277.5	30.9985	14.2145
	137.5	5.2212	0		140	5.33011	0.43		77.5	2.6073	11.56		433.5	30.9985	19.247
	140	5.33011	0		148	5.67863	0.11		82	2.80334	11.17		433.5	43.9271	19.247
	157.5	6.0925	0		157.5	6.0925	0.44		87	3.02117	11.11		633.5	43.9271	23.8
	160	6.3625	0		160	6.3625	0.25		92	3.23899	12.51		633.5	39.313	23.8
	170	7.4425	0		170	7.4425	-0.02		97.5	3.4786	9.938		788	39.313	27.73
	177.5	8.2525	0.61		177.5	8.2525	0.36		102	3.67464	11.65		788	30.3571	27.73
	180	8.5225	0		180	8.5225	0.29		107	3.89247	9.839		822	30.3571	28.85
	190	9.5009	0		207	11.1642	1.6		112	4.11029	10.75		822	24.2105	28.85
	200	10.4793	0		210	11.4577	1.47		117.5	4.3499	9.041		868	24.2105	30.75
	202	10.675	0		212	11.6534	1.81		122	4.54594	10.88		868	37.9412	30.75
	207	11.1642	0		217.5	12.1915	1.68		127	4.76377	7.299		932.5	37.9412	32.45
	210	11.4577	0		220	12.2758	1.51		132	4.98159	8.808		932.5	30.6452	32.45
	212	11.6534	1.17		222.5	12.3601	1.2		137	5.19942	7.226		970.5	30.6452	33.69
	217	12.1426	1.25		227	12.5118	0.82		137.5	5.2212	7.975		970.5	38.2184	33.69
	220	12.2758	0.64		230	12.613	0.92		142	5.41724	9.063		1037	38.2184	35.43
	222.5	12.3601	0		232	12.6804	1.18		147	5.63507	8.088		1037	55.1095	35.43
	227	12.5118	0		240	12.9501	0.94		152	5.85289	10.88		1188	55.1095	38.17
	230	12.613	0		242	13.0176	1.17		157.5	6.0925	7.474		1188	42.5258	38.17
	232	12.6804	0		247	13.1861	1.26		162	6.5785	6.273		1270.5	42.5258	40.11
	238.5	12.8995	0		250	13.2873	0.88		167	7.1185	7.158		1270.5	76.9231	40.11
	240	12.9501	0		252	13.3547	1.15		172	7.6585	7.331		1370.5	76.9231	41.41
	242	13.0176	0		262	13.6919	1.05		177.5	8.2525	6.217		1370.5	84.0426	41.41
	247	13.1861	1.55		267	13.8605	1.06		182	8.71818	7.165		1528.5	84.0426	43.29
	250	13.2873	0		272	14.0291	1.2		187	9.20738	8.826		1528.5	67.0455	43.29
	252	13.3547	0		277.5	14.2145	1.4		192	9.69658	9.287		1764.5	67.0455	46.81
	257.5	13.5402	0		280	14.2951	1.64		197.5	10.2347	8.425		1764.5	33.5616	46.81
	260	13.6245	1.42		290	14.6177	1.22		202	10.675	10.31		1838	33.5616	49
	262	13.6919	0		296.5	14.8274	1.6		207	11.1642	15.28
	267	13.8605	0		298	14.8758	1.74		212	11.6534	18.9
	270	13.9616	0		307	15.1662	1.99		217	12.1426	17.15
	272	14.0291	0.54		308	15.1984	1.56		222.5	12.3601	13.37
	277.5	14.2145	0		312	15.3275	2.12		227	12.5118	12.09
	280	14.2951	0		318	15.521	1.99		232	12.6804	10.4
	282	14.3597	0		322	15.6501	1.75		238.5	12.8995	8.864
	287	14.521	0		327	15.8114	1.88		242	13.0176	9.202
	290	14.6177	0		328	15.8436	1.71		247	13.1861	9.599
	292	14.6823	0.04		333.5	16.021	1.53		252	13.3547	9.687
	296.5	14.8274	0		337	16.1339	2.41		257.5	13.5402	9.229
	298	14.8758	0		338	16.1662	1.58		262	13.6919	10.12
	302	15.0049	0		342	16.2952	2.53		267	13.8605	11.74
	307	15.1662	0.58		347	16.4565	2.54		272	14.0291	11.33
	308	15.1984	0		348	16.4888	2.28		277.5	14.2145	9.229
	312	15.3275	1.6		353.5	16.6662	2.4		282	14.3597	8.771
	317.5	15.5049	0.34		357	16.7791	2.69		287	14.521	8.05
	318	15.521	1.41		358	16.8114	2.34		292	14.6823	7.638
	322	15.6501	1.35		362	16.9404	2.43		296.5	14.8274	8.629
	327	15.8114	0.84		367	17.1017	2.82		302	15.0049	10.14
	333.5	16.021	9.55		368	17.134	2.59		307	15.1662	12.79
	337	16.1339	6.35		373.5	17.3114	2.73		312	15.3275	18.5
	338	16.1662	7.1		377	17.4243	2.92		317.5	15.5049	11.23
	342	16.2952	3.7		378	17.4566	2.66		322	15.6501	14.91
	347	16.4565	5.07		382	17.5856	2.65		327	15.8114	13.45
	348	16.4888	5.78		387	17.7469	2.32		333.5	16.021	10.35
	353.5	16.6662	0		388	17.7792	2.29		337	16.1339	10.04
	357	16.7791	3		393.5	17.9566	2		342	16.2952	8.715
	362	16.9404	3.75		397	18.0695	2.04		347	16.4565	10.87
	367	17.1017	4.41		398	18.1018	2.27		353.5	16.6662	9.208
	368	17.134	1.83		402	18.2308	2.24		357	16.7791	10.74
	373.5	17.3114	2.88		407	18.3921	2.11		362	16.9404	10.99
	377	17.4243	3.47		413.5	18.6018	1.88		367	17.1017	9.721
	378	17.4566	2.44		417	18.7147	1.96		373.5	17.3114	8.973
	382	17.5856	0.42		418	18.747	2.01		377	17.4243	10.47
	387	17.7469	0.07		422	18.876	2.21		382	17.5856	12.41
	393.5	17.9566	0		427	19.0373	2.19		387	17.7469	13.41
	397	18.0695	0		428	19.0696	2.15		393.5	17.9566	9.056
	402	18.2308	0		433.5	19.247	2.18		397	18.0695	10.14
	407	18.3921	1		437	19.3267	1.97		402	18.2308	12.67
	413.5	18.6018	0		438	19.3494	2.06		407	18.3921	12.05
	417	18.7147	0.08		442	19.4405	1.95		413.5	18.6018	11.88
	422	18.876	0		447	19.5543	1.96		417	18.7147	13.31
	427	19.0373	0.67		453.5	19.7023	2.03		422	18.876	13.45
	433.5	19.247	0		457	19.782	1.94		427	19.0373	13.07
	437	19.3267	0		458	19.8047	1.68		433.5	19.247	10.43
	442	19.4405	1.87		462	19.8958	1.99		437	19.3267	12.98
	447	19.5543	0		467	20.0096	1.93		442	19.4405	12.31
	453.5	19.7023	1.52		468	20.0324	1.9		447	19.5543	10.74
	457	19.782	0		473.5	20.1576	2.12		453.5	19.7023	10.79
	462	19.8958	0.79		477	20.2373	1.9		457	19.782	12.86
	467	20.0096	1.1		478	20.26	1.91		462	19.8958	12.53
	473.5	20.1576	2.5		482	20.3511	2.11		467	20.0096	11.44
	477	20.2373	1.46		487	20.4649	1.83		473.5	20.1576	11.76
	482	20.3511	2.04		488	20.4877	1.82		477	20.2373	13.29
	487	20.4649	0.06		493.5	20.6129	1.89		482	20.3511	12.88
	493.5	20.6129	0.39		497	20.6926	1.93		487	20.4649	13.03
	497	20.6926	0		498	20.7153	1.83		493.5	20.6129	11.43
	502	20.8064	0		502	20.8064	1.67		497	20.6926	10.85
	507	20.9202	0		507	20.9202	1.99		502	20.8064	11.04
	513.5	21.0682	0		508	20.943	2.05		507	20.9202	11.02
	517	21.1479	0.53		513.5	21.0682	1.83		513.5	21.0682	11.18
	522	21.2617	0		517	21.1479	1.85		517	21.1479	9.188
	527	21.3755	1.14		518	21.1706	1.39		522	21.2617	11.17
	533.5	21.5235	0		522	21.2617	1.79		527	21.3755	12.08
	537	21.6032	0		527	21.3755	1.82		533.5	21.5235	10.82
	542	21.717	0		528	21.3983	2.06		537	21.6032	11.61
	547	21.8308	1.06		533.5	21.5235	2.1		542	21.717	11.55
	553.5	21.9788	0.06		537	21.6032	1.87		547	21.8308	12.45
	557	22.0585	0.74		538	21.6259	1.88		553.5	21.9788	10.36
	562	22.1723	0.9		542	21.717	2.08		557	22.0585	11.8
	567	22.2861	0		547	21.8308	2		562	22.1723	12.63
	573.5	22.4341	0		548	21.8536	2.01		567	22.2861	10.88
	577	22.5138	0		553.5	21.9788	2		573.5	22.4341	9.535
	582	22.6276	1.3		557	22.0585	1.87		577	22.5138	11.93
	587	22.7414	0		558	22.0812	1.93		582	22.6276	11.13
	588	22.7642	0		562	22.1723	1.87		587	22.7414	11.93
	593.5	22.8894	0		567	22.2861	1.92		593.5	22.8894	10.11
	597	22.9691	0		568	22.3089	2.09		597	22.9691	13.4
	602	23.0829	1.01		573.5	22.4341	2.13		602	23.0829	10.32
	608	23.2195	0		578	22.5365	1.97		613.5	23.3447	9.601
	613.5	23.3447	0.37		588	22.7642	2.17		617	23.4244	10.09
	618	23.4471	0.49		593.5	22.8894	2.07		622	23.5382	13.16
	622	23.5382	0		597	22.9691	2.28		627	23.652	6.78
	627	23.652	0.83		608	23.2195	1.99		637	23.889	11.6
	633.5	23.8	2.73		618	23.4471	1.9		642	24.0162	11.81
	637	23.889	1.14		622	23.5382	2.02		647	24.1434	12.31
	638	23.9145	0.39		627	23.652	2.28		653.5	24.3087	9.783
	642	24.0162	0		628	23.6748	2.01		657	24.3978	11.31
	647	24.1434	1.13		633.5	23.8	2.62		662	24.525	12.68
	653.5	24.3087	0.41		637	23.889	2.56		667	24.6521	11.47
	657	24.3978	0.48		638	23.9145	2.45		677	24.9065	10.1
	662	24.525	0.87		642	24.0162	2.24		682	25.0337	10.8
	667	24.6521	0.91		647	24.1434	2.18		687	25.1609	10.04
	668	24.6776	0		648	24.1688	1.56		697	25.4152	10.1
	673.5	24.8175	0.53		657	24.3978	2.34		702	25.5424	9.85
	682	25.0337	0		662	24.525	2.32		713.5	25.835	9.368
	687	25.1609	1.24		667	24.6521	2.37		717	25.924	10.69
	693.5	25.3262	0.82		668	24.6776	2.39		722	26.0512	12.49
	697	25.4152	1.47		673.5	24.8175	2.03		727	26.1783	6.103
	702	25.5424	1.87		677	24.9065	2.31		733.5	26.3437	9.708
	707	25.6696	1.71		678	24.9319	2.21		737	26.4327	10.47
	713.5	25.835	0		687	25.1609	2.55		742	26.5599	10.37
	717	25.924	0		688	25.1863	2.14		747.5	26.6998	7.85
	718	25.9494	0		693.5	25.3262	2.805		752	26.8143	9.805
	728	26.2038	0		697	25.4152	2.84		757	26.9415	8.712
	733.5	26.3437	0		702	25.5424	2.6		762	27.0686	9.7
	737	26.4327	1		707	25.6696	2.48		767	27.1958	9.12
	738	26.4582	0		708	25.695	2		772	27.323	9.461
	742	26.5599	0		713	25.8222	2.18		777	27.4502	9.822
	744	26.6108	0.84		713.5	25.835	1.38		782	27.5774	7.535
	747.5	26.6998	0		718	25.9494	2.15		787	27.7046	10.39
	752	26.8143	0.65		727	26.1783	2.49		793.5	27.9112	10.53
	758	26.9669	1.35		728	26.2038	1.68		797	28.0265	10.29
	762	27.0686	0.06		733.5	26.3437	1.49		802	28.1912	8.932
	768	27.2213	1.24		744	26.6108	1.87		807	28.3559	11.25
	777	27.4502	1.76		752	26.8143	1.87		817	28.6853	6.974
	778	27.4756	0		758	26.9669	1.97		822	28.85	8.58
	782	27.5774	0.79		762	27.0686	1.97		827	29.0565	11.73
	787	27.7046	0		768	27.2213	1.93		833.5	29.325	9.734
	788	27.73	0		773.5	27.3612	1.06		837	29.4696	10.76
	793.5	27.9112	0		777	27.4502	1.67		842	29.6761	9.47
	797	28.0265	0.88		778	27.4756	1.16		847	29.8826	7.888
	798	28.0594	0.8		782	27.5774	1.32		853.5	30.1511	9.999
	802	28.1912	0		787	27.7046	1.74		857	30.2957	10.03
	807	28.3559	1.11		788	27.73	1.82		862	30.5022	10.52
	808	28.3888	0		793.5	27.9112	1.75		867	30.7087	10.18
	813.5	28.57	0.07		797	28.0265	2.45		873.5	30.895	12.28
	817	28.6853	0		798	28.0594	2.38		877	30.9872	12.2
	822	28.85	0.57		802	28.1912	2.43		882	31.119	11.91
	827	29.0565	0		807	28.3559	1.95		887	31.2508	12.17
	833.5	29.325	2.08		808	28.3888	1.97		892.5	31.3957	11.93
	837	29.4696	1.83		813.5	28.57	1.48		897	31.5143	13.38
	842	29.6761	3.47		817	28.6853	1.47		902	31.6461	12.08
	847	29.8826	5.36		822	28.85	1.9		907	31.7779	11.51
	853.5	30.1511	0		827	29.0565	2.02		912.5	31.9229	6.394
	857	30.2957	0.69		828	29.0978	1.98		917	32.0415	10.09
	862	30.5022	2.31		833.5	29.325	2.38		922	32.1733	9.584
	867	30.7087	0		837	29.4696	2.44		927	32.305	10.31
	873.5	30.895	0		838	29.5109	2.48		932.5	32.45	10.65
	877	30.9872	0.67		842	29.6761	2.42		937	32.5968	14.57
	882	31.119	0.58		847	29.8826	2.32		942.5	32.7763	13.13
	887	31.2508	0		848	29.9239	2.18		947	32.9232	13.26
	892.5	31.3957	0		853.5	30.1511	1.98		952.5	33.1026	11.17
	894	31.4353	1.43		857	30.2957	2.26		956.5	33.2332	7.926
	897	31.5143	0.45		858	30.337	1.82		962.5	33.4289	11.59
	902	31.6461	2.51		862	30.5022	1.74		966.5	33.5595	13.12
	907	31.7779	2.17		867	30.7087	1.47		970.5	33.69	13.44
	912.5	31.9229	0.22		868	30.75	1.78		972.5	33.7423	16.37
	917	32.0415	0.93		873.5	30.895	2.07		977	33.8601	17.53
	922	32.1733	0		877	30.9872	1.84		982	33.9909	16.81
	927	32.305	0.8		878	31.0136	1.97		987	34.1217	16.74
	932.5	32.45	0.79		882	31.119	2.01		992.5	34.2656	14.56
	937	32.5968	1.23		887	31.2508	1.97		997	34.3834	15.11
	942.5	32.7763	1.97		888	31.2771	2.24		1002	34.5142	9.604
	947	32.9232	0.91		892.5	31.3957	1.89		1005.5	34.6058	6.577
	952.5	33.1026	0		894	31.4353	1.46		1007	34.645	11.11
	956.5	33.2332	1.53		897	31.5143	1.91		1010.5	34.7366	8.74
	958	33.2821	0		902	31.6461	2.15		1012.5	34.7889	8.725
	962.5	33.4289	0		907	31.7779	1.53		1014.5	34.8413	8.677
	966.5	33.5595	1.53		912.5	31.9229	1.58		1017	34.9067	9.529
	968	33.6084	0		917	32.0415	1.56		1020.5	34.9983	5.573
	970.5	33.69	0.11		918	32.0678	1.42		1022	35.0375	7.042
	972.5	33.7423	0.87		922	32.1733	1.63		1027	35.1683	7.304
	978	33.8862	0.11		927	32.305	1.53		1030.5	35.2599	6.026
	982	33.9909	0		928	32.3314	1.04		1032	35.2992	10.01
	988	34.1479	0.06		932.5	32.45	1.53		1037	35.43	12.48
	992.5	34.2656	0.44		937	32.5968	2.19		1042.5	35.5298	14.62
	998	34.4095	0		938	32.6295	2.02		1044.5	35.5661	15.01
	1002	34.5142	1		942.5	32.7763	2.11		1046.5	35.6024	14.63
	1005.5	34.6058	0.95		947	32.9232	2.2		1050.5	35.675	15.83
	1007	34.645	0.73		948	32.9558	2.1		1052	35.7022	15.9
	1008	34.6712	1.33		952.5	33.1026	1.47		1055.5	35.7657	14.4
	1010.5	34.7366	0.2		956.5	33.2332	2		1056.5	35.7838	14.63
	1012.5	34.7889	1.17		958	33.2821	1.18		1060	35.8474	17.76
	1014.5	34.8413	0.1		962.5	33.4289	1.49		1062	35.8836	17.1
	1018	34.9329	0		966.5	33.5595	1.8		1063.5	35.9109	16.09
	1020.5	34.9983	0.7		968	33.6084	1.37		1064	35.9199	17.91
	1022	35.0375	0		970.5	33.69	1.91		1070	36.0288	10.42
	1028	35.1945	0.45		972.5	33.7423	1.96		1072	36.0651	10.46
	1030.5	35.2599	0		977	33.8601	2.07		1074	36.1014	10.51
	1032	35.2992	1.2		978	33.8862	2.03		1076	36.1377	10.6
	1038	35.4481	0.65		982	33.9909	2.03		1080	36.2103	10.6
	1042.5	35.5298	0		987	34.1217	1.76		1082	36.2466	9.374
	1044.5	35.5661	0.14		988	34.1479	1.74		1083.5	36.2738	6.409
	1046.5	35.6024	1.42		992.5	34.2656	1.93		1084	36.2828	10.97
	1048	35.6296	4.22		997	34.3834	1.8		1086	36.3191	10.69
	1050.5	35.675	0		998	34.4095	1.77		1090	36.3917	11.94
	1052	35.7022	0		1002	34.5142	1.38		1092	36.428	14.65
	1055.5	35.7657	0		1005.5	34.6058	1.23		1094	36.4643	13.32
	1056.5	35.7838	0		1007	34.645	1.35		1096	36.5006	11.76
	1058	35.8111	3.11		1010.5	34.7366	1.71		1100	36.5732	10.18
	1060	35.8474	0.21		1012.5	34.7889	1.08		1102	36.6095	11.29
	1063.5	35.9109	0		1014.5	34.8413	1.05		1103.5	36.6367	10.62
	1066	35.9562	0		1018	34.9329	1.03		1104	36.6458	10.89
	1068	35.9925	1.14		1020.5	34.9983	1.05		1106	36.6821	11.02
	1070	36.0288	0		1028	35.1945	0.88		1110	36.7546	9.329
	1074	36.1014	1.63		1030.5	35.2599	1.17		1112	36.7909	9.435
	1078	36.174	0		1032	35.2992	1.37		1114	36.8272	7.507
	1080	36.2103	0		1037	35.43	1.22		1116	36.8635	7.616
	1084	36.2828	1.15		1038	35.4481	1.75		1120	36.9361	6.86
	1088	36.3554	0.16		1042.5	35.5298	1.63		1122	36.9724	7.48
	1090	36.3917	1.6		1044.5	35.5661	1.88		1123.5	36.9996	6.223
	1094	36.4643	0.08		1045.5	35.5842	2.2		1124	37.0087	7.834
	1098	36.5369	0		1050.5	35.675	2.11		1126	37.045	7.493
	1100	36.5732	1.43		1052	35.7022	2.27		1130	37.1175	8.249
	1102	36.6095	0.8		1055.5	35.7657	1.96		1132	37.1538	7.791
	1103.5	36.6367	0		1056.5	35.7838	2		1134	37.1901	8.299
	1106	36.6821	0.59		1058	35.8111	1.86		1136	37.2264	8.543
	1108	36.7183	0.41		1060	35.8474	2.01		1140	37.299	9.969
	1110	36.7546	3.12		1063.5	35.9109	1.52		1142	37.3353	8.725
	1114	36.8272	0.68		1066	35.9562	1.4		1143.5	37.3625	9.902
	1116	36.8635	0.72		1068	35.9925	1.08		1144	37.3716	9.069
	1118	36.8998	0.59		1070	36.0288	1.5		1146	37.4079	10.22
	1120	36.9361	1.02		1078	36.174	1.12		1150	37.4805	9.779
	1122	36.9724	0		1083.5	36.2738	0.89		1152	37.5168	9.914
	1126	37.045	0		1084	36.2828	1.62		1154	37.553	9.512
	1128	37.0813	0.47		1088	36.3554	1.27		1156	37.5893	9.762
	1130	37.1175	1.94		1090	36.3917	1.26		1160	37.6619	11.91
	1132	37.1538	0		1098	36.5369	0.79		1162	37.6982	12.63
	1136	37.2264	0.96		1100	36.5732	1.14		1164	37.7345	11.05
	1138	37.2627	0		1103.5	36.6367	1.2		1166	37.7708	9.108
	1140	37.299	0		1106	36.6821	0.87		1170	37.8434	12.26
	1144	37.3716	1.42		1108	36.7183	0.78		1172	37.8797	11.8
	1146	37.4079	0.07		1110	36.7546	0.98		1174	37.916	12.55
	1148	37.4442	0.71		1114	36.8272	1.5		1176	37.9523	13.07
	1152	37.5168	0.7		1118	36.8998	1.04		1180	38.0248	13.5
	1156	37.5893	1.79		1123.5	36.9996	0.8		1182	38.0611	13.04
	1158	37.6256	1.29		1124	37.0087	1.3		1183.5	38.0883	13.55
	1160	37.6619	0.75		1128	37.0813	0.65		1184	38.0974	12.91
	1162	37.6982	1.71		1134	37.1901	1.34		1186	38.1337	13.48
	1166	37.7708	0.07		1138	37.2627	0.7		1190	38.217	14.73
	1168	37.8071	0.72		1140	37.299	0.93		1192	38.2641	19.16
	1170	37.8434	0.67		1143.5	37.3625	1.06		1194	38.3111	18.73
	1174	37.916	1.63		1144	37.3716	1.09		1195.5	38.3464	17.82
	1178	37.9885	2.56		1146	37.4079	1.02		1196	38.3581	15.64
	1182	38.0611	0.7		1148	37.4442	0.92		1200	38.4522	15.48
	1184	38.0974	0.21		1150	37.4805	1.01		1202	38.4992	14.14
	1188	38.17	0.41		1152	37.5168	0.92		1204.5	38.558	12.89
	1190	38.217	0.08		1156	37.5893	0.88		1206	38.5933	11.69
	1192	38.2641	3.23		1158	37.6256	0.64		1209.5	38.6756	11.36
	1194	38.3111	1.16		1160	37.6619	1.22		1212.5	38.7461	11.98
	1195.5	38.3464	0.99		1166	37.7708	1.39		1214	38.7814	11.62
	1196	38.3581	7.85		1168	37.8071	0.86		1215.5	38.8167	10.77
	1198	38.4052	5.41		1170	37.8434	1.51		1220	38.9225	11.84
	1200	38.4522	2.72		1174	37.916	1.7		1222.5	38.9813	12.07
	1202	38.4992	8.69		1178	37.9885	1.23		1224	39.0165	11.6
	1204	38.5462	6.95		1182	38.0611	1.36		1226	39.0636	13.45
	1206	38.5933	5.54		1184	38.0974	1.1		1228.5	39.1224	12.73
	1208	38.6403	15.62		1188	38.17	1.42		1230	39.1576	14.08
	1209.5	38.6756	9.69		1190	38.217	1.79		1231.5	39.1929	14.7
	1212.5	38.7461	2.41		1192	38.2641	2.02		1233.5	39.2399	14.46
	1214	38.7814	2.32		1194	38.3111	1.88		1234	39.2517	17.09
	1215.5	38.8167	8.71		1195.5	38.3464	1.9		1235.5	39.287	16.12
	1218	38.8755	5.58		1196	38.3581	2.17		1236	39.2987	17.42
	1220	38.9225	6.22		1198	38.4052	2		1237.5	39.334	16.2
	1222	38.9695	3.16		1200	38.4522	2.01		1240.5	39.4045	17.62
	1224	39.0165	1.74		1202	38.4992	2.01		1244.5	39.4986	14.89
	1226	39.0636	6.16		1204.5	38.558	2.09		1250.5	39.6397	12.52
	1228	39.1106	5.9		1206	38.5933	1.98		1251.5	39.6632	11.47
	1230	39.1576	2.92		1208	38.6403	2.1		1260.5	39.8748	11.45
	1231.5	39.1929	2.12		1209.5	38.6756	1.77		1263.5	39.9454	11.98
	1233.5	39.2399	1.98		1212.5	38.7461	2.02		1267.5	40.0395	15.28
	1234	39.2517	2.12		1214	38.7814	2.21		1268.5	40.063	16.36
	1235.5	39.287	1.34		1215.5	38.8167	2.06		1270.5	40.11	15.24
	1237.5	39.334	4.29		1218	38.8755	2.29		1274.5	40.162	16.23
	1238	39.3458	1.14		1220	38.9225	1.98		1278.5	40.214	17.01
	1240.5	39.4045	0		1222.5	38.9813	1.98		1283	40.2725	16.9
	1244.5	39.4986	0.54		1224	39.0165	2.2		1287.5	40.331	16.21
	1248	39.5809	1.64		1226	39.0636	2.28		1288.5	40.344	16.95
	1250.5	39.6397	0.3		1228	39.1106	2.24		1290.5	40.37	16.53
	1251.5	39.6632	0		1228.5	39.1224	2.28		1291.5	40.383	16.44
	1258	39.8161	0		1230	39.1576	2.36		1294	40.4155	17.86
	1260.5	39.8748	0		1231.5	39.1929	2.17		1301.5	40.513	17.44
	1263.5	39.9454	1.2		1233.5	39.2399	2.21		1307.5	40.591	14.3
	1267.5	40.0395	0.81		1234	39.2517	2.41		1308.5	40.604	14.3
	1268	40.0512	2.61		1235.5	39.287	2.13		1309.5	40.617	16.09
	1268.5	40.063	0		1236	39.2987	2.3		1313.5	40.669	15.16
	1270.5	40.11	1.5		1237.5	39.334	2.19		1318.5	40.734	11.75
	1274.5	40.162	0.87		1238	39.3458	1.87		1319.5	40.747	13.37
	1278	40.2075	1.33		1240.5	39.4045	1.61		1321.5	40.773	12.54
	1283	40.2725	0.96		1248	39.5809	1.8		1323.5	40.799	11.02
	1288	40.3375	0		1251.5	39.6632	1.11		1332.5	40.916	8.741
	1290.5	40.37	0		1257.5	39.8043	1.45		1343	41.0525	9.29
	1291.5	40.383	1.42		1258	39.8161	1.19		1352.5	41.176	8.685
	1294	40.4155	0.91		1260.5	39.8748	1.28		1353.5	41.189	9.105
	1298	40.4675	1.81		1263.5	39.9454	1.44		1365.5	41.345	9.398
	1301.5	40.513	1.5		1267.5	40.0395	1.68		1370.5	41.41	11.06
	1307.5	40.591	0.55		1268	40.0512	0.96		1374	41.4516	13.17
	1308	40.5975	1.01		1270.5	40.11	1.75		1379.5	41.5171	14.41
	1309.5	40.617	1.03		1274.5	40.162	1.97		1381.5	41.5409	16.16
	1313.5	40.669	2.3		1278	40.2075	1.56		1383.5	41.5647	17.89
	1318	40.7275	0.95		1278.5	40.214	1.74		1391.5	41.6599	15.58
	1321.5	40.773	0.92		1287.5	40.331	1.63		1400.5	41.767	15.26
	1323.5	40.799	0.13		1288	40.3375	1.47		1410.5	41.8859	13.74
	1328	40.8575	0		1288.5	40.344	1.85		1412.5	41.9097	15.14
	1332.5	40.916	0		1290.5	40.37	1.34		1415.5	41.9454	16.75
	1338	40.9875	1.27		1291.5	40.383	1.75		1418.5	41.9811	18.57
	1343	41.0525	1.73		1298	40.4675	1.31		1421.5	42.0168	15.4
	1348	41.1175	0.93		1301.5	40.513	1.44		1425.5	42.0644	11.32
	1352.5	41.176	0.54		1307.5	40.591	1.52		1430.5	42.1239	8.319
	1358	41.2475	0.69		1308	40.5975	1.49		1444	42.2846	10.96
	1365.5	41.345	0.54		1308.5	40.604	1.4		1450.5	42.3619	10.06
	1368	41.3775	0		1309.5	40.617	1.78		1460.5	42.4809	10.56
	1370.5	41.41	0		1313.5	40.669	1.54		1462.5	42.5047	10.05
	1374	41.4516	0.1		1318	40.7275	1.24		1468.5	42.5761	8.307
	1378	41.4992	0		1318.5	40.734	1.53		1470.5	42.5999	8.937
	1379.5	41.5171	0.07		1319.5	40.747	1.52		1475	42.6534	11.57
	1381.5	41.5409	1		1321.5	40.773	1.54		1481.5	42.7308	9.121
	1388	41.6182	0		1323.5	40.799	1.6		1485	42.7724	8.474
	1391.5	41.6599	0.22		1328	40.8575	1.35		1495	42.8914	9.771
	1398	41.7372	0.04		1332.5	40.916	1.3		1505	43.0104	10.96
	1408	41.8562	1.39		1348	41.1175	1.3		1512.5	43.0996	10.52
	1412.5	41.9097	2.94		1352.5	41.176	1.15		1515	43.1294	10.09
	1418	41.9752	0		1353.5	41.189	1.11		1523.5	43.2305	10.72
	1421.5	42.0168	0.09		1358	41.2475	1.18		1527	43.2722	11.24
	1428	42.0942	0.08		1368	41.3775	1.11		1530.5	43.3198	11.19
	1430.5	42.1239	0.23		1370.5	41.41	1.18		1533.5	43.3646	16.69
	1438	42.2132	0.89		1378	41.4992	1.88		1536.5	43.4093	19.78
	1444	42.2846	1.11		1379.5	41.5171	1.52		1538.5	43.4392	20.09
	1448	42.3322	1.7		1381.5	41.5409	1.82		1539.5	43.4541	21.03
	1450.5	42.3619	0.51		1383.5	41.5647	1.78		1541.5	43.4839	20.04
	1458	42.4511	0		1388	41.6182	1.97		1542.5	43.4988	19.51
	1460.5	42.4809	0.06		1391.5	41.6599	1.99		1543.5	43.5137	19.27
	1462.5	42.5047	0		1398	41.7372	2.07		1550.5	43.6181	19.11
	1468	42.5701	0.06		1400.5	41.767	2.08		1554.5	43.6778	17.6
	1470.5	42.5999	0		1408	41.8562	2.12		1556.5	43.7076	19.11
	1475	42.6534	0.5		1410.5	41.8859	1.82		1561.5	43.7822	17.04
	1478	42.6891	0		1412.5	41.9097	1.9		1563.5	43.812	18.39
	1481.5	42.7308	1.11		1415.5	41.9454	1.91		1564.5	43.8269	16.14
	1485	42.7724	0.87		1418	41.9752	1.53		1571.5	43.9314	12.94
	1488	42.8081	0.1		1418.5	41.9811	1.73		1580.5	44.0656	11.59
	1495	42.8914	1.72		1420.5	42.0049	2.06		1584.5	44.1253	14.43
	1498	42.9271	1.36		1421.5	42.0168	1.26		1586.5	44.1551	15.49
	1505	43.0104	1.51		1430.5	42.1239	1.17		1588.5	44.1849	15.52
	1508	43.0461	0		1438	42.2132	1.12		1589.5	44.1998	16.29
	1512.5	43.0996	0.83		1458	42.4511	1.2		1592.5	44.2446	12.02
	1518	43.1651	0		1460.5	42.4809	1.06		1594.5	44.2744	12.8
	1523.5	43.2305	0		1462.5	42.5047	1.7		1598.5	44.3341	11.64
	1528	43.2841	1.11		1468	42.5701	0.99		1599.5	44.349	11.69
	1533.5	43.3646	0.67		1468.5	42.5761	1.19		1603.5	44.4086	9.446
	1536.5	43.4093	0		1470.5	42.5999	1.5		1610.5	44.5131	13.76
	1538	43.4317	0		1478	42.6891	1.26		1615.5	44.5876	11.3
	1542.5	43.4988	0.15		1481.5	42.7308	0.91		1619.5	44.6473	11.94
	1548	43.5808	0		1488	42.8081	0.44		1623	44.6995	12.8
	1550.5	43.6181	0.85		1498	42.9271	1.03		1630.5	44.8114	12.1
	1554.5	43.6778	0.88		1508	43.0461	1.04		1633	44.8486	11.87
	1556.5	43.7076	0		1512.5	43.0996	1.18		1641.5	44.9754	11.88
	1558	43.73	0.05		1518	43.1651	1.17		1644	45.0127	10.26
	1561.5	43.7822	0.71		1523.5	43.2305	1.07		1653.5	45.1544	8.996
	1568	43.8792	0.12		1528.5	43.29	1.31		1663	45.2961	9.227
	1571.5	43.9314	0		1533.5	43.3646	1.65		1673.5	45.4527	8.27
	1578	44.0283	0.87		1536.5	43.4093	1.56		1683	45.5944	9.66
	1584.5	44.1253	1.59		1538	43.4317	1.92		1690.5	45.7063	9.941
	1588	44.1775	0		1538.5	43.4392	1.8		1694.5	45.7659	9.872
	1592.5	44.2446	0.92		1539.5	43.4541	1.77		1696.5	45.7958	9.474
	1598	44.3266	1.29		1541.5	43.4839	1.8		1723.5	46.1985	8.946
	1603.5	44.4086	0.77		1542.5	43.4988	1.86		1743.5	46.4968	9.938
	1608	44.4758	0.48		1543.5	43.5137	1.63		1753.5	46.6459	9.879
	1610.5	44.5131	0		1548	43.5808	1.84		1759.5	46.7354	15.58
	1618	44.6249	0		1550.5	43.6181	1.87		1764.5	46.81	20.87
	1623	44.6995	0		1554.5	43.6778	1.54		1774.5	47.108	20.81
	1628	44.7741	0		1556.5	43.7076	1.77		1780.5	47.2867	20.34
	1633	44.8486	0		1558	43.73	1.51		1782	47.3314	23.47
	1638	44.9232	0		1561.5	43.7822	1.29		1785	47.4208	21.64
	1641	44.968	0.74		1563.5	43.812	1.57		1790.5	47.5847	18.21
	1644	45.0127	0.77		1564.5	43.8269	1.34		1794	47.689	18.31
	1648	45.0724	1.43		1568	43.8792	1.46		1796.5	47.7635	15.06
	1653	45.1469	0.34		1571.5	43.9314	1.67		1798	47.8082	16.38
	1658	45.2215	1.17		1578	44.0283	1.17		1802.5	47.9422	16.07
	1663	45.2961	0		1580.5	44.0656	1.12		1804.5	48.0018	13.45
	1668	45.3707	1.4		1584.5	44.1253	1		1806	48.0465	11.84
	1673.5	45.4527	0.71		1586.5	44.1551	1.09		1810.5	48.1806	11.46
	1678	45.5198	0.92		1588	44.1775	1.28		1813	48.2551	9.715
	1683	45.5944	0		1589.5	44.1998	1.48		1815.5	48.3296	11.72
	1688	45.669	0.83		1592.5	44.2446	1.27		1820.5	48.4786	15.42
	1690.5	45.7063	0		1598	44.3266	1.17		1826.5	48.6573	16.9
	1696.5	45.7958	0.72		1599.5	44.349	1.5		1827.5	48.6871	16.65
	1698	45.8181	0		1608	44.4758	1.22		1829.5	48.7467	19.15
	1708	45.9673	0.92		1610.5	44.5131	1.37		1831	48.7914	18.19
	1718	46.1164	0.13		1618	44.6249	1.04		1833	48.851	17.13
	1728	46.2656	0		1628	44.7741	1.16		1835.5	48.9255	17.06
	1738	46.4147	0.84		1630.5	44.8114	1.61		1836	48.9404	16.93
	1743.5	46.4968	0		1638	44.9232	1.19		1839.5		14.47
	1748	46.5639	0		1648	45.0724	1.04		1841.5		16.69
	1753.5	46.6459	1.09		1658	45.2215	1		1842.5		14.79
	1758	46.7131	0		1668	45.3707	1.07
	1759.5	46.7354	0.59		1678	45.5198	1.32
	1764.5	46.81	0.94		1688	45.669	0.89
	1768	46.9143	0.83		1698	45.8181	0.88
	1778	47.2122	0.93		1708	45.9673	1.11
	1780.5	47.2867	0.71		1718	46.1164	1.01
	1782	47.3314	1.11		1728	46.2656	1.27
	1785	47.4208	0.54		1738	46.4147	1.14
	1788	47.5102	0.1		1764.5	46.81	1.99
	1790.5	47.5847	0.9		1768	46.9143	1.96
	1794	47.689	3.26		1778	47.2122	2.03
	1796.5	47.7635	1.54		1780.5	47.2867	2.09
	1798	47.8082	3.27		1782	47.3314	2.1
	1802.5	47.9422	4.24		1785	47.4208	2.05
	1804.5	48.0018	3.62		1788	47.5102	2.1
	1806	48.0465	3.27		1790.5	47.5847	2.22
	1808	48.1061	4.64		1794	47.689	2.16
	1813	48.2551	6.32		1796.5	47.7635	2.21
	1815.5	48.3296	4.45		1798	47.8082	2.18
	1818	48.4041	3.23		1802.5	47.9422	2.22
	1820.5	48.4786	2		1804.5	48.0018	2.23
	1826.5	48.6573	0		1806	48.0465	2.23
	1827.5	48.6871	1.1		1808	48.1061	2.1
	1829.5	48.7467	0.26		1813	48.2551	2.26
	1831	48.7914	2.59		1815.5	48.3296	2.08
	1833	48.851	0.98		1818	48.4041	1.94
	1835.5	48.9255	0.09		1820.5	48.4786	2.04
	1838	49	0.08		1827.5	48.6871	1.9
	1839.5		0		1828	48.702	1.68
	1841.5		0.14		1829.5	48.7467	1.57
	1842.5		0.45		1831	48.7914	1.77
	1844		0.48		1833	48.851	1.31
					1835.5	48.9255	1.54
					1838	49	1.25
					1839.5		1.32
					1841.5		1.64
					1842.5		1.59
					1844		1.43

## Sheet: MD95-2043 dinocyst data
OBSNAME	Age	ALEX	ACHO	ATAX	BTEP	IACU	IPAL	IPAR	IPAT	ISPH	ISTR	IPLI	IVEL	IJAP	ISPP	LMAC	NLAB	OCEN	OISR	OJAN	PZOH	PRET	SALA	SMEM	SDEL	SELO	SRAM	SBEN	SLAZ	SMIR	SGRA	SPAC	SSPP	TPEL	PDAL	IMIN	IMIC	ESPP	BSPP	DUBR	PERI	LSAB	LOLI	LSSP	SNEP	XAND	SQUA	PSTE	TAPP
991	27.2395	0	0	0.268817	2.15054	0.806452	0	0	0.537634	0.537634	0	0	0	0	0	1.07527	13.4409	16.9355	0.268817	0.268817	0.268817	1.07527	0	5.10753	0.268817	0.806452	0.268817	1.07527	1.34409	1.34409	0	0.537634	8.60215	0	0.268817	0	0	1.88172	31.9892	0	0.806452	0	0	0	0.537634	0	2.15054	0	0
1005	28.015	0.3003	0	0	1.2012	3.9039	0	0	0	1.5015	0	0	0	0	0	1.2012	26.4264	20.1201	0.3003	0	0	0	0	1.5015	0.3003	3.9039	0.900901	0.900901	0.600601	1.5015	0	0.600601	7.80781	0	0.3003	0	0	0.600601	14.7147	0	0.600601	0	0	0	0	0	1.2012	0	0.600601
1011	28.3149	0.27933	0	0	2.23464	4.18994	0	0	0	0.27933	0	0	0	0	0.558659	0.558659	26.257	32.9609	0.558659	0	0.27933	0	0	1.39665	0.27933	5.86592	1.11732	0.27933	0.837989	3.07263	0	0	11.1732	0	0	0	0	0	2.51397	0	0.27933	0	0	0	0	0	0.558659	0	0
1021	28.5615	0.826446	0	0.275482	2.20386	1.10193	0	0	0.275482	0.275482	0.275482	0	0	0	0	0.275482	19.8347	13.7741	0	0.550964	0	0.275482	0	1.10193	0.275482	1.65289	0	0.275482	0	1.65289	0	0	5.23416	0	0	0	0	0	39.9449	0	1.37741	0	0	0	0.550964	0	1.92837	0	0
1031	28.8078	0.558659	0	0.27933	5.58659	1.39665	0	0	0.27933	1.11732	0.837989	0	0	0	0	1.95531	13.1285	13.4078	0	0	0	0.558659	0	2.23464	0	2.7933	0.27933	1.67598	0.837989	1.39665	0	0	9.49721	0	0	0	0	0.558659	34.9162	0	0.837989	0	0	0	0	0	1.67598	0	0.27933
1045	29.4123	0.649351	0	0	6.81818	3.8961	0	0	0	1.62338	0	0	0	0	0.324675	0	9.41558	16.5584	0	0	0	0	0	2.5974	0	3.57143	0.974026	0.324675	0.974026	0.974026	0	0	13.3117	0	0	0	0	0	31.8182	0	0	0	0	0	0	0	0.324675	0	1.62338
1051	29.8705	0	0	0	31.6993	1.96078	0	0	0	1.30719	0	0	0	0	0	0.326797	7.51634	19.6078	0	0	0	0	0	1.30719	0.326797	1.63399	0.653595	0	1.30719	1.30719	0	0	6.20915	0	0	0	0	0	20.5882	0	0	0	0	0	0	0	0.653595	0	0.326797
1061	30.4417	1.54799	0	0.309598	8.97833	0.619195	0	0	0	0	0	0	0	0	0	0.928793	14.5511	24.1486	0	0	0	0	0	0.309598	0.309598	2.47678	4.33437	0.928793	0.928793	1.54799	0	0.309598	7.43034	0	0	0	0	0.309598	25.0774	0	0.309598	0	0	0	0.309598	0	0.928793	0	0
1071	30.8985	1.4881	0	0	3.86905	1.4881	0	0	0.297619	0.892857	0	0	0	0	0	1.19048	22.0238	27.0833	0.297619	0	0	0	0	0.595238	0	0.892857	2.97619	0.595238	1.78571	1.78571	0	0.297619	11.0119	0	0.297619	0	0	0	14.2857	0	0.297619	0	0	0	0	0	1.4881	0	0.297619
1085	31.1642	0	0	0.328947	0.328947	0.328947	0	0	0.328947	0.657895	0	0	0	0	0.328947	0.986842	60.5263	11.1842	0	0	0.328947	0.328947	0	1.64474	0	0.657895	1.97368	0.657895	1.31579	0.657895	0	0	6.25	0	0	0	0	0	5.59211	0	0	0	0	0	0	0	0.986842	0	0
1091	31.3092	0.293255	0	0	1.75953	0	0	0	0	2.05279	0	0	0	0	0	0.58651	46.0411	31.085	0	0	0	0	0	0.293255	0	1.75953	0.58651	0	0	0	0	0	4.98534	0	0	0	0	0	5.27859	0	0.293255	0	0	0	0	0	1.17302	0	0.293255
1101	31.5523	0	0	0	1.97368	0.657895	0	0	0.986842	0.986842	0	0	0	0	0	1.31579	31.5789	41.1184	0	0	0	0	0	0	0	1.31579	1.31579	0.657895	0	0	0	0.328947	4.93421	0	0	0	0	0	6.57895	0	0.328947	0	0	0	0	0	0	0	0
1111	31.7875	0	0	0	0.909091	0.30303	0	0	0	0.606061	0	0	0	0	0	0.909091	44.5455	21.8182	0	0	0	0	0	0	0	1.21212	1.51515	0	0	0	0	0.30303	6.9697	0	0	0	0	0	15.1515	0	0	0	0	0	0.606061	0	1.21212	0	0
1125	32.0325	0	0	0.662252	2.98013	0.331126	0	0	0.662252	0	0	0	0	0	0	2.64901	17.5497	14.2384	0.331126	0	0	0.993377	0	1.98675	0.331126	0.662252	0.331126	0.662252	1.3245	5.62914	0	0	8.60927	0	0	0	0	0.993377	31.7881	0	0.331126	0	0	0	0.331126	0	1.65563	0	0
1131	32.1595	0.458716	0	0	5.04587	0.917431	0	0	0.458716	1.37615	0	0	0	0	0	1.37615	14.2202	9.63303	0	0	0	0	0	0.917431	0.458716	1.83486	0	0.458716	0	2.29358	0	0	7.79817	0	0	0	0	0	43.578	0	0.458716	0	0	0	0	0	0.917431	0	0
1141	32.5545	0	0	0.319489	4.79233	0.958466	0	0	0.638978	0.319489	0.319489	0	0	0	0.319489	1.27796	17.5719	21.7252	0	0	0	0.319489	0	1.27796	1.91693	2.55591	1.59744	1.59744	0.319489	1.91693	0	0.958466	12.7796	0	0	0	0	0	19.8083	0	0	0	0	0	0	0	0.638978	0	0.319489
1151	32.933	0	0	0.993377	4.63576	0.662252	0	0	0	0.662252	0	0	0	0	0	0.993377	25.1656	16.5563	0	0	0	0	0	1.3245	0.993377	2.31788	1.65563	0.993377	0.662252	0.662252	0	0.331126	7.61589	0	0	0	0	0	29.1391	0	0	0	0	0	0	0	0.993377	0	0.331126
1155	33.0248	0	0	0	2.19436	0.31348	0	0	0	0	0	0	0	0	0.31348	0.940439	44.5141	16.6144	0	0	0	0.31348	0	0	0	1.25392	0.626959	0.31348	0.31348	0	0	0	6.89655	0	0	0	0	0	19.7492	0	0.31348	0	0	0	0	0	2.19436	0	0
1165	33.2538	0	0	0.478469	0	0	0	0	0.478469	0.478469	0	0	0	0	0	4.30622	19.1388	22.0096	0	0.478469	0	0	0	0.478469	0.478469	0.956938	0.956938	1.43541	0	4.30622	0	0	5.26316	0	0	0	0	0	33.4928	0	0.956938	0	0	0	0.956938	0.478469	0.478469	0	0
1171	33.391	0.591716	0	0	0.295858	0	0	0	0	0.591716	0.295858	0	0	0	0	3.84615	19.5266	37.8698	0	0	0	0	0	0.295858	0.591716	1.18343	1.47929	0.295858	0.295858	3.25444	0	0.295858	8.87574	0	0	0	0	0.295858	13.0178	0	0.295858	0	0	0	0.295858	0	1.18343	0	0.295858
1181	33.8555	0	0	0	0.647249	0.970874	0	0	0	0	0	0	0	0	0	0	21.3592	46.6019	0	0	0	0	0	0.323625	0	1.61812	0.323625	0	0	0.323625	0	0	4.53074	0	0	0	0	0.323625	17.4757	0	0.323625	0	0	0	0	0	0.323625	0	0
1191	34.4205	0	0	0	0	0	0	0	0	0.308642	0	0	0	0	0	0.925926	45.679	28.3951	0	0	0	0	0	0.308642	0	3.39506	1.54321	0	0	0.308642	0	0	5.24691	0	0	0	0	0	8.64198	0	0	0	0	0	0	0	0.308642	0	0
1205	34.7648	0	0	0	0	0	0	0	0.655738	0.655738	0.327869	0	0	0	0	8.19672	20	19.0164	0	0	0	0	0	1.96721	0.655738	0.327869	0.983607	0.655738	0.327869	7.54098	0	0	13.7705	0	0	0	0	0.327869	13.1148	0	0.327869	0	0	0	0	0	3.93443	0	0
1211	34.8597	0	0	0	0.613497	0.306748	0	0	1.53374	0.613497	0	0	0	0	0	6.44172	12.5767	27.3006	0	0	0	0	0	1.22699	0	0.920245	2.45399	1.22699	0	3.68098	0	0	7.66871	0	0.306748	0	0	0.613497	22.0859	0	1.22699	0	0	0	0.306748	0	2.45399	0	0.306748
1221	35.0187	0.302115	0	0.302115	0.60423	0.302115	0	0	0	0.60423	1.20846	0	0	0	0	6.34441	17.2205	16.6163	0	0	0	0	0	1.51057	0	1.51057	1.51057	0.60423	0	9.06344	0	0	10.574	0	0	0	0	1.20846	25.3776	0	0.302115	0	0	0	1.20846	0	2.1148	0	0
1231	35.177	0.323625	0	0.323625	0.323625	0.323625	0	0	0.323625	0	0.647249	0	0	0	0	5.17799	18.7702	25.2427	0	0	0	0.323625	0	1.2945	0.323625	1.2945	1.2945	0.647249	0.647249	4.85437	0	0.323625	6.14887	0	0	0	0	0.970874	23.301	0	1.2945	0	0	0	0.323625	0	2.26537	0	0
1245	35.7867	0.666667	0	0	3.66667	1.66667	0	0	0	0.333333	0	0	0	0	0	5	44.6667	21.6667	0	0	0	0	0	0	0.333333	2	0	0	0.333333	0	0	0.333333	5.33333	0	0	0	0	0	10	0	0	0	0	0	0	0	0.666667	0	0
1251	36.199	0	0	0	1.16959	0.584795	0	0	0	0	0	0	0	0	0.292398	19.2982	25.4386	23.9766	0	0	0	0	0	1.75439	0	1.46199	3.80117	0	0	0.877193	0	0	4.38596	0	0	0	0	0	13.7427	0	0	0	0	0	0.292398	0	0.584795	0	0
1261	36.49	0	0	0	0	0	0	0	0	0	0	0	0	0	0	41.6938	15.6352	19.8697	0	0	0	0	0	0.325733	0	0	7.49186	0.977199	0	0.651466	0	0	4.88599	0	0	0	0	0	6.18893	0	0	0	0	0	0	0	0.977199	0	0
1271	36.78	0	0	0.294985	0.294985	0	0	0	0	0.589971	0	0	0	0	0	12.0944	21.8289	6.48968	0	0	0	0.294985	0	2.0649	0	0	19.469	0.589971	0	1.17994	0	0	16.8142	0	0	0	0	0	11.7994	0	0.884956	0	0	0	0	0	0.884956	0	0
1285	37.187	0.31348	0	0	0.626959	0.940439	0	0.31348	0.626959	0	0	0	0	0	0	19.4357	8.77743	7.52351	0	0.31348	0	1.25392	0	2.50784	0.626959	0	0	0.940439	0.31348	7.83699	0	0	6.58307	0	0	0	0	0	27.5862	0	3.44828	0	0	0	0.31348	0	5.01567	0	1.25392
1291	37.361	0	0	0	1.54799	0.309598	0	0	0	0	0	0	0	0	0.309598	16.4087	12.0743	6.50155	0	0	0	0.309598	0	0.309598	0.928793	0	0.309598	0.928793	0.619195	8.04954	0	0	7.12074	0	0	0	0	0	28.483	0	3.71517	0	0	0	0.619195	0	4.33437	0	2.16718
1301	37.652	0.619195	0	0.309598	2.47678	0.928793	0	0	0.309598	0.309598	0	0	0	0	0.928793	4.64396	5.26316	15.1703	0	0	0	2.16718	0	0.619195	0.619195	0.309598	0	1.85759	0.309598	3.40557	0	0.309598	10.5263	0	0	0	0	0	38.3901	0	1.54799	0	0	0	1.23839	0	4.95356	0	0.928793
1311	37.942	0.307692	0	0	3.38462	3.69231	0	0.307692	0.615385	0	0	0	0	0	0.923077	2.15385	4.92308	16.3077	0	0	0	0	0	2.15385	0	0.307692	0	3.07692	0	1.53846	0	0.307692	6.15385	0	0	0	0	0	44.3077	0	1.84615	0	0	0	1.53846	0	1.53846	0	0.615385
1325	38.5217	0	0	0.307692	4.61538	0.923077	0	0	0	0.307692	0	0	0	0	0.307692	1.84615	5.53846	28.9231	0	0	0.307692	0	0	0.615385	0.307692	0.923077	0.307692	2.15385	0.615385	4	0	0	5.53846	0	0	0	0	0.923077	34.7692	0	0.615385	0	0	0	1.23077	0	2.15385	0	0
1331	38.8174	0	0	0	8.57143	1.26984	0	0	0.31746	0.952381	0	0	0	0	0	0.31746	3.1746	40	0	0	0	0.634921	0	0.952381	0	1.5873	0	3.1746	1.5873	2.22222	0	0.31746	5.07937	0	0	0	0	0	24.7619	0	0	0	0	0	0	0	0	0	0
1341	39.3102	0	0	0	11.4846	2.52101	0	0	0	0	0	0	0	0	0.560224	0.840336	7.84314	16.5266	0	0	0	0	0	1.96078	0	1.12045	0.280112	1.40056	1.40056	1.68067	0	0.280112	5.60224	0	0	0	0	0	43.9776	0	0	0	0	0	0	0	1.12045	0	0
1351	39.8029	0	0	0	11.1111	4.62963	0	0	0	0.308642	0	0	0	0	0	1.23457	5.8642	13.8889	0	0	0	0	0	0.617284	0	2.16049	0.308642	1.85185	0	1.85185	0	2.77778	6.48148	0	0	0	0	0	43.5185	0	0.308642	0	0	0	0.308642	0	0.617284	0	0
1365	40.2889	0.331126	0	0	2.31788	0.993377	0	0	0.993377	2.31788	0.331126	0	0	0	0.662252	16.8874	17.8808	15.5629	0	0	0	0	0	0.331126	0	0.331126	1.65563	0.662252	0.662252	1.3245	0	0.331126	6.29139	0	0	0	0	0.331126	21.1921	0	0	0	0	0	0.662252	0	3.97351	0	0.331126
1371	40.4622	0	0	0	2.29508	1.63934	0	0.655738	0.327869	0.983607	0	0	0	0	0	13.7705	23.2787	20.9836	0	0	0	0.983607	0	0.655738	0	0	1.31148	0.655738	0.327869	1.63934	0	0	6.88525	0	0	0	0	0	16.7213	0	0.655738	0	0	0	0.327869	0	2.29508	0	0.327869
1381	40.7511	0.314465	0	0	3.45912	0.943396	0	0	0	1.25786	0	0	0	0	0	0.628931	32.7044	38.9937	0	0	0	0.628931	0	0.314465	0	0	1.57233	0.314465	0	0.943396	0	0	4.08805	0	0	0	0	0	10.6918	0	0.314465	0	0	0	0.314465	0	0.628931	0	0
1391	41.04	0.322581	0	0	1.6129	0.645161	0	0	0.322581	0.967742	0	0	0	0	0	1.93548	24.1935	42.9032	0	0	0	0.645161	0	1.29032	0	0	0.967742	0.645161	0	0.322581	0	0	2.90323	0	0	0	0	0	14.5161	0	0	0	0	0	0.645161	0	1.6129	0	0
1405	41.4909	0.802139	0	0	4.27807	1.87166	0	0	0	0.534759	0	0	0	0	0	1.3369	15.2406	19.5187	0	0	0	0.26738	0	0.26738	0	0	0.534759	0.802139	0.26738	0.534759	0	0.802139	5.88235	0	0	0	0	0	41.1765	0	1.06952	0	0	0	0.26738	0	1.3369	0	0
1411	41.72	0	0	0.337838	4.39189	4.39189	0	0.675676	0.337838	1.35135	0	0	0	0	0	1.01351	35.473	29.0541	0	0	0	0	0	0.337838	0	1.01351	2.36486	0	0.337838	1.01351	0	0.337838	6.08108	0	0	0	0	0	9.7973	0	0	0	0	0	0	0	0	0	0
1421	42.1018	0.325733	0	0.325733	6.84039	0.325733	0	0.325733	0.651466	1.62866	0	0	0	0	0	0.977199	56.0261	6.18893	0	0	0	0.325733	0	0.651466	0	0	2.9316	0	0	0	0	0	6.51466	0	0	0	0	0	10.0977	0	0.325733	0	0	0	0.325733	0	0.977199	0	0
1431	42.4836	0.325733	0	0	0.977199	0.325733	0	0	0.977199	2.28013	0	0	0	0	0	2.28013	36.4821	14.658	0	0	0	0.651466	0	1.62866	0	0	2.9316	0.325733	0	0.977199	0	0	12.0521	0	0	0	0	0	13.6808	0	0.325733	0	0	0	0.651466	0	3.90879	0	0.325733
1445	43.0182	0	0	0	2.13415	1.52439	0	0	0.304878	0.914634	0	0	0	0	0.304878	2.7439	17.378	35.9756	0	0	0	0	0	1.21951	0	1.21951	1.52439	0.304878	0.304878	2.13415	0	0	7.62195	0	0	0	0	0.304878	17.0732	0	1.52439	0	0	0	0	0	2.43902	0	0
1451	43.2473	0	0	0	0.990099	1.9802	0	0	0	1.32013	0	0	0	0	0	2.64026	31.0231	35.3135	0	0	0	0.990099	0	0.330033	0	0.990099	2.31023	0.660066	0.330033	1.65017	0	0	8.58086	0	0	0	0	0	6.60066	0	0.330033	0	0	0	0	0	2.64026	0	0
1461	43.7857	0.311526	0	0.311526	1.55763	2.80374	0	0	0	2.18069	0	0	0	0	0	2.49221	16.5109	49.8442	0	0	0	0	0	0.311526	0	1.55763	1.55763	0	1.55763	0	0	0	5.29595	0	0	0	0	0	7.78816	0	0.311526	0	0	0	0	0	0.311526	0	0
1471	44.4286	0	0	0	2.94985	0	0	0	0.294985	0.589971	0	0	0	0	0	7.66962	56.0472	15.3392	0	0	0	0	0	0.294985	0	0.294985	5.60472	0	0.294985	0.294985	0	0	3.53982	0	0	0	0	0	3.53982	0	0.294985	0	0	0	0	0	0	0	0
1485	45.3286	0	0	0.318471	1.27389	0	0	0	0.318471	0.318471	0.318471	0	0	0	0	14.3312	63.3758	2.86624	0	0	0	0.636943	0	0	0	0	2.86624	0	0	0.636943	0	0	4.4586	0	0	0	0	0	4.77707	0	0.318471	0	0	0	0.318471	0	0.955414	0	0.318471
1491	45.7143	0	0	0	0.328947	0.328947	0	0	0.328947	0.986842	0	0	0	0	0	9.53947	69.0789	2.96053	0	0	0	0.328947	0	0.328947	0	0	0.657895	0.657895	0	0.657895	0	0	6.90789	0	0	0	0	0	2.96053	0	0.328947	0	0	0	0	0	1.31579	0	0
1501	46.3571	0.657895	0	0.328947	1.31579	0	0	0.328947	0.657895	0.986842	0.328947	0	0	0	0.328947	7.23684	37.5	12.1711	0	0	0	0.986842	0	1.31579	0	1.64474	0.657895	0	0.657895	2.63158	0	0	9.21053	0	0	0	0	0.328947	10.8553	0	1.31579	0	0	0	0.657895	0	2.30263	0	0.657895
1511	47.0018	0	0	0.996678	2.32558	0.996678	0	0.332226	3.32226	1.3289	0	0	0	0	0	6.31229	6.64452	19.6013	0	0	0	0.332226	0	2.99003	0	2.32558	0.332226	0	1.66113	3.98671	0	0.996678	8.63787	0	0	0	0	0.996678	22.2591	0	2.65781	0	0	0	1.3289	0	4.98339	0	0
1525	47.9333	0	0	0	3.16456	4.11392	0	0	0	0.316456	0	0	0	0	0	1.58228	6.96203	25.6329	0.316456	0	0	0	0	0.632911	0	3.48101	0.632911	0.632911	6.64557	2.53165	0	0	24.3671	0	0.949367	0	0	0	12.9747	0	0.632911	0	0	0	0	0	0.632911	0	0
1531	48.3333	0.531915	0	0.265957	3.19149	3.19149	0	0	0	0.531915	0	0	0	0	0.265957	3.7234	14.0957	18.3511	0	0	0	0	0	3.7234	0.265957	2.39362	1.59574	0	1.8617	3.98936	0	1.8617	11.1702	0	0	0	0	0	23.6702	0	0.531915	0	0	0	0.265957	0	0	0	0
1541	49.1377	0	0	0	1	2.33333	0	0.333333	0	0.333333	0	0	0	0	0	8.33333	35	23.6667	0	0	0	0	0	0.333333	0.666667	1.33333	4.66667	0	0.333333	0.666667	0	0.333333	12.3333	0	0	0	0	0	3	0	0	0	0	0	0.333333	0	2.33333	0	0.333333
[truncated: 15 more columns]
