# Supplementary material for: Palaeohydrological changes over the last 50 ky in the central Gulf of Cadiz:complex forcing mechanisms mixing multi-scale processes
Source: Copernicus journal article supplement (doi:10.5194/bg-13-5357-2016), 2016-09-27
Supplement: Supplementary file [file bg-13-5357-2016-supplement-title-page.pdf › bg-13-5357-2016-supplement-title-page.pdf]

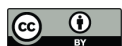

## *Supplement of*

# **Palaeohydrological changes over the last 50 ky in the central Gulf of Cadiz: complex forcing mechanisms mixing multi-scale processes**

**Aurélie Penaud et al.**

*Correspondence to:* Aurélie Penaud ([aurelie.penaud@univ-brest.fr](mailto:aurelie.penaud@univ-brest.fr))

- [bg-13-5357-2016-supplement-title-page.pdf](#)
- [MD99-2339-SUPPLEMENT.xls](#)

The copyright of individual parts of the supplement might differ from the CC-BY 3.0 licence.
